1 **December 4, 2018**

## 2 **Alternative hydrogen uptake pathways**

### 3 **suppress methane production in ruminants**

4 **Chris Greening<sup>1</sup> \* #, Renae Geier<sup>2</sup> #, Cecilia Wang<sup>3</sup>, Laura C. Woods<sup>1</sup>, Sergio E.**  
5 **Morales<sup>3</sup>, Michael J. McDonald<sup>1</sup>, Rowena Rushton-Green<sup>3</sup>, Xochitl C. Morgan<sup>3</sup>,**  
6 **Satoshi Koike<sup>4</sup>, Sinead C. Leahy<sup>5</sup>, William J. Kelly<sup>6</sup>, Isaac Cann<sup>2</sup>, Graeme T.**  
7 **Attwood<sup>5</sup>, Gregory M. Cook<sup>3</sup>, Roderick I. Mackie<sup>2</sup> \***

8

9 <sup>1</sup> Monash University, School of Biological Sciences, Clayton, VIC 3800, Australia

10 <sup>2</sup> University of Illinois at Urbana-Champaign, Department of Animal Sciences and  
11 Institute for Genomic Biology, Urbana, IL 61801, USA

12 <sup>3</sup> University of Otago, Department of Microbiology and Immunology, Dunedin 9016,  
13 New Zealand

14 <sup>4</sup> Hokkaido University, Research Faculty of Agriculture, Sapporo, Japan

15 <sup>5</sup> AgResearch Ltd., Grasslands Research Centre, Palmerston North 4410, New  
16 Zealand.

17 <sup>6</sup> Donvis Ltd., Palmerston North 4410, New Zealand.

18

19 # These authors contributed equally to this work.

20

21 \* Correspondence can be addressed to:

22

23 Dr Chris Greening (chris.greening@monash.edu), School of Biological Sciences,  
24 Monash University, Clayton, VIC 3800, Australia

25 Prof Roderick Mackie (r-mackie@illinois.edu), Department of Animal Sciences,  
26 Urbana, IL 61801, USA

27

## 28 Abstract

29 Farmed ruminants are the largest source of anthropogenic methane emissions  
30 globally. The methanogenic archaea responsible for these emissions use molecular  
31 hydrogen (H<sub>2</sub>), produced during bacterial and eukaryotic carbohydrate fermentation,  
32 as their primary energy source. In this work, we used comparative genomic,  
33 metatranscriptomic, and co-culture-based approaches to gain a system-wide  
34 understanding of the organisms and pathways responsible for ruminal H<sub>2</sub> metabolism.  
35 Two thirds of sequenced rumen bacterial and archaeal genomes encode enzymes  
36 that catalyze H<sub>2</sub> production or consumption, including 26 distinct hydrogenase  
37 subgroups. Metatranscriptomic analysis confirmed that these hydrogenases are  
38 differentially expressed in sheep rumen. Electron-bifurcating [FeFe]-hydrogenases  
39 from carbohydrate-fermenting Clostridia (e.g. *Ruminococcus*) accounted for half of all  
40 hydrogenase transcripts. Various H<sub>2</sub> uptake pathways were also expressed, including  
41 methanogenesis (*Methanobrevibacter*), fumarate reduction and nitrate ammonification  
42 (*Selenomonas*), and acetogenesis (*Blautia*). Whereas methanogenesis predominated  
43 in high methane yield sheep, alternative uptake pathways were significantly  
44 upregulated in low methane yield sheep. Complementing these findings, we observed  
45 significant differential expression and activity of the hydrogenases of the  
46 hydrogenogenic cellulose fermenter *Ruminococcus albus* and the hydrogenotrophic  
47 fumarate reducer *Wolinella succinogenes* in co-culture compared to pure culture. We  
48 conclude that H<sub>2</sub> metabolism is a more complex and widespread trait among rumen  
49 microorganisms than previously recognized. There is evidence that alternative  
50 hydrogenotrophs, including acetogens and selenomonads, can prosper in the rumen  
51 and effectively compete with methanogens for H<sub>2</sub> in low methane yield ruminants.  
52 Strategies to increase flux through alternative H<sub>2</sub> uptake pathways, including animal  
53 selection, dietary supplementation, and methanogenesis inhibitors, may lead to  
54 sustained methane mitigation.

## 55 Introduction

56

57 Methane production by livestock accounts for over 5% of global greenhouse gas  
58 emissions annually <sup>1</sup>. These emissions mostly originate from the activity of  
59 methanogens within ruminants, which generate methane as an obligate end-product  
60 of their energy metabolism <sup>2</sup>. Several lineages of methanogenic archaea are core  
61 members of the microbiome of the ruminant foregut <sup>3–5</sup>. Of these, hydrogenotrophic  
62 methanogens are dominant in terms of both methane emissions and community  
63 composition <sup>6,7</sup>, with global surveys indicating that *Methanobrevibacter gottschalkii*  
64 and *Methanobrevibacter ruminantium* comprise 74% of the rumen methanogen  
65 community <sup>5</sup>. These organisms use molecular hydrogen (H<sub>2</sub>) to reduce carbon dioxide  
66 (CO<sub>2</sub>) to methane through the Wolfe cycle of methanogenesis <sup>8,9</sup>. Rumen  
67 methanogens have also been identified that use formate, acetate, methyl compounds,  
68 and ethanol as substrates, but usually do so in conjunction with H<sub>2</sub> <sup>5,10–12</sup>. Given their  
69 major contribution to greenhouse gas emissions, multiple programs are underway to  
70 mitigate ruminant methane production <sup>13,14</sup>. To date, most strategies have focused on  
71 direct inhibition of methanogens using chemical compounds or vaccines <sup>15–18</sup>. A  
72 promising alternative strategy is to modulate the supply of substrates to methanogens,  
73 such as H<sub>2</sub>, for example through dietary or probiotic interventions <sup>14,19,20</sup>. To achieve  
74 this, while maintaining productivity of the host animal, requires an understanding of  
75 the processes that mediate substrate supply to methanogens within the rumen.

76

77 H<sub>2</sub>, the main substrate supporting ruminal methanogenesis, is primarily produced  
78 through fermentation processes <sup>6</sup>. Various carbohydrate fermentation pathways lead  
79 to the production of H<sub>2</sub> as an end-product, together with volatile fatty acids (VFAs) and  
80 CO<sub>2</sub> <sup>21–23</sup>. This process is supported by hydrogenases, which reoxidize cofactors  
81 reduced during carbohydrate fermentation and dispose of the derived electrons by  
82 producing H<sub>2</sub>. While it is unclear which rumen microorganisms mediate H<sub>2</sub> production  
83 *in situ*, a range of isolates have been shown to produce H<sub>2</sub> *in vitro* <sup>24–28</sup>. For example,  
84 the model rumen bacterium *Ruminococcus albus* 7 reoxidizes the reduced ferredoxin  
85 and NADH formed during glucose fermentation using two different [FeFe]-  
86 hydrogenases depending on environmental conditions <sup>29</sup>. In addition, it is well-  
87 established that some rumen fungi and ciliates produce H<sub>2</sub> *via* hydrogenosomes <sup>30,31</sup>.

88 A further potential source is the nitrogenase reaction, which produces one H<sub>2</sub> for every  
89 N<sub>2</sub> fixed; however, while numerous rumen microorganisms encode putative  
90 nitrogenases<sup>21</sup>, there is no convincing *in situ* evidence that N<sub>2</sub> fixation occurs in the  
91 rumen<sup>32</sup>. A large proportion of the H<sub>2</sub> produced by hydrogenogenic fermenters is  
92 directly transferred to hydrogenotrophic methanogens, in an ecological process known  
93 as interspecies hydrogen transfer<sup>25,33</sup>. Particularly remarkable are the endosymbiotic  
94 and ectosymbiotic associations of methanogens, such as *M. ruminantium*, with rumen  
95 ciliates<sup>34–36</sup>. In addition to providing a continual substrate supply for methanogens,  
96 such symbioses benefit fermenters by maintaining H<sub>2</sub> at sufficiently low concentrations  
97 for fermentation to remain thermodynamically favorable<sup>37</sup>.

98  
99 Various hydrogenotrophic bacteria are thought to compete with methanogens for the  
100 rumen H<sub>2</sub> supply. Most attention has focused on homoacetogens, which mediate  
101 conversion of H<sub>2</sub>/CO<sub>2</sub> to acetate using [FeFe]-hydrogenases<sup>38</sup>. Several genera of  
102 homoacetogens have been isolated from the rumen, including *Eubacterium*<sup>39</sup>, *Blautia*  
103<sup>40</sup>, and *Acetitomaculum*<sup>41</sup>. However, molecular surveys indicate their abundance is  
104 generally lower than hydrogenotrophic methanogens<sup>42–44</sup>. This is thought to reflect  
105 that methanogens outcompete acetogens due to the higher free energy yield of their  
106 metabolic processes, as well as their higher affinity for H<sub>2</sub>. The dissolved H<sub>2</sub>  
107 concentration fluctuates in the rumen depending on diet, time of feeding, and rumen  
108 turnover rates, but is generally at concentrations between 400 to 3400 nM<sup>45</sup>; these  
109 concentrations are typically always above the threshold concentrations required for  
110 methanogens (< 75 nM) but often below those of homoacetogens (< 700 nM)<sup>46</sup>.  
111 Despite this, it has been proposed that stimulation of homoacetogens may be an  
112 effective strategy for methane mitigation in methanogen-inhibited scenarios<sup>14,20,47,48</sup>.  
113 Various microorganisms have also been isolated from cows and sheep that support  
114 anaerobic hydrogenotrophic respiration, including dissimilatory sulfate reduction (e.g.  
115 *Desulfovibrio desulfuricans*)<sup>49,50</sup>, fumarate reduction and nitrate ammonification (e.g.  
116 *Selenomonas ruminantium*, *Wolinella succinogenes*)<sup>51–58</sup>, and trimethylamine *N*-oxide  
117 reduction (e.g. *Denitrobacterium detoxificans*)<sup>59</sup>. The first described and most  
118 comprehensively studied of these hydrogen oxidizers is *W. succinogenes*, which  
119 mediates interspecies hydrogen transfer with *R. albus*<sup>25</sup>. In all cases, respiratory  
120 electron transfer *via* membrane-bound [NiFe]-hydrogenases and terminal reductases  
121 generates a proton-motive force that supports oxidative phosphorylation<sup>60</sup>. It is



122 generally assumed that these pathways are minor ones and are limited by the  
123 availability of oxidants. Promisingly, it has been observed that dietary supplementation  
124 with fumarate, sulfate, or nitrate can significantly reduce methane production in cattle,  
125 likely by stimulating alternative pathways of H<sub>2</sub> consumption <sup>61,62</sup>.

126

127 We postulate that mitigating methane emissions, while maintaining animal  
128 productivity, depends on understanding and controlling H<sub>2</sub> utilization by methanogens.  
129 This requires a system-wide perspective of the schemes for production and  
130 concomitant utilization of H<sub>2</sub> in the rumen. To facilitate this, we determined which  
131 organisms and enzymes are primarily responsible for H<sub>2</sub> production and consumption  
132 in rumen. Firstly, we screened genome, metagenome, and metatranscriptome  
133 datasets <sup>21,63,64</sup> to resolve the microbial genera, metabolic pathways, and hydrogenase  
134 classes <sup>65,66</sup> that mediate H<sub>2</sub> metabolism. We demonstrate that ruminants harbor a  
135 diverse community of hydrogenogenic fermenters and hydrogenotrophic  
136 methanogens, acetogens, sulfate reducers, fumarate reducers, and denitrifiers.  
137 Secondly, we used the model system of the H<sub>2</sub>-producing carbohydrate fermenter  
138 *Ruminococcus albus* 7 and the H<sub>2</sub>-utilizing fumarate-reducing syntrophic partner  
139 *Wolinella succinogenes* DSM 1740 <sup>25,53,54,67</sup> to gain a deeper mechanistic  
140 understanding of how and why ruminant bacteria regulate H<sub>2</sub> metabolism. We  
141 observed significant differences in the growth, transcriptome, and metabolite profiles  
142 of these bacteria in co-culture compared to pure culture. Finally, we compared gene  
143 expression profiles associated with H<sub>2</sub> metabolism between low- versus high-methane  
144 yield sheep <sup>63</sup>. It was recently proposed, on the basis of community structure analysis,  
145 that fewer H<sub>2</sub>-producing bacteria inhabit low methane yield sheep <sup>68</sup>. In this work, we  
146 present an alternative explanation: H<sub>2</sub> uptake through non-methanogenic pathways  
147 accounts for these differences. Whereas the enzymes mediating fermentative H<sub>2</sub>  
148 production are expressed at similar levels, those supporting H<sub>2</sub> uptake through  
149 acetogenesis, fumarate reduction, and denitrification pathways are highly upregulated  
150 in low methane yield sheep. In turn, these findings support that strategies to promote  
151 alternative H<sub>2</sub> uptake pathways, including through dietary modulation, may  
152 significantly reduce methane emissions.

153

## 154 Results

155

156 **H<sub>2</sub> metabolism is a common and diverse trait among rumen bacteria, archaea,**  
157 **and eukaryotes**

158

159 We searched the 501 reference genome sequences of rumen bacteria and archaea <sup>21</sup>  
160 for genes encoding the catalytic subunits of H<sub>2</sub>-consuming and H<sub>2</sub>-producing enzymes  
161 **(Table S1 & S2)**. Of these, 65% encoded the capacity to metabolise H<sub>2</sub> via [FeFe]-  
162 hydrogenases (42%), [NiFe]-hydrogenases (31%), [Fe]-hydrogenases (2.4%), and/or  
163 nitrogenases (23%). This suggests that H<sub>2</sub> metabolism is a widespread trait among  
164 rumen microorganisms. We also identified multiple partial sequences of group A1  
165 [FeFe]-hydrogenases in the incomplete genomes of six rumen fungi and ciliates. This  
166 is consistent with the known ability of these microorganisms to produce H<sub>2</sub> during  
167 cellulose fermentation <sup>31</sup>. The 329 hydrogenase- and nitrogenase-positive genomes  
168 spanned 108 genera, 26 orders, 18 classes, and 11 phyla **(Figure 1; Figure S1; Table**  
169 **S1 & S2)**.

170

171 We then classified the hydrogenases identified into subgroups. To do so, we used the  
172 phylogeny-based, functionally-predictive classification scheme of HydDB <sup>66</sup>, which has  
173 been used to understand H<sub>2</sub> metabolism in a range of organisms and ecosystems <sup>69–</sup>  
174 <sup>72</sup>. In total, 273 strains encoded hydrogenases from classes that primarily evolve H<sub>2</sub>  
175 under physiological conditions **(Table S2)**. These include group A1 and B [FeFe]-  
176 hydrogenases and group 4e [NiFe]-hydrogenases that couple ferredoxin oxidation to  
177 H<sub>2</sub> production in anaerobic bacteria <sup>73–75</sup>. However, the most widespread  
178 hydrogenases are the group A3 [FeFe]-hydrogenases, which were encoded in 43  
179 genera, among them well-characterized carbohydrate fermenters such as  
180 *Ruminococcus*, *Lachnoclostridium*, and *Bacteroides*. These hydrogenases form  
181 heterotrimeric complexes, together with diaphorase subunits, that mediate the  
182 recently-discovered process of electron-confurcation: coupling co-oxidation of NADH  
183 and ferredoxin produced during fermentative carbon degradation to production of H<sub>2</sub>  
184 <sup>29,76</sup>. This reversible complex can also support hydrogenotrophic acetogenesis <sup>77</sup>. By  
185 retrieving the genes immediately upstream and downstream, we verified that the  
186 diaphorase subunits (HydB) of this complex were co-encoded with the retrieved  
187 hydrogenase subunits **(Figure 1; Table S2)**.

188

189 In addition, multiple organisms encoded hydrogenases and terminal reductases  
190 known to support hydrogenotrophic growth (**Figure 1**). All 21 methanogen genomes  
191 surveyed harbored [NiFe]-hydrogenases together with the signature gene of  
192 methanogenesis (*mcrA*) (**Figure 1; Table S2**). These include 14 *Methanobrevibacter*  
193 strains, which encoded a complete set of enzymes for mediating hydrogenotrophic  
194 methanogenesis through the Wolfe cycle<sup>8</sup>, including the [Fe]-hydrogenase and the  
195 groups 3a, 3c, 4h, and 4i [NiFe]-hydrogenases. Seven genomes encoded both [FeFe]-  
196 hydrogenases (A2, A3) and the marker gene for acetogenesis (*acsB*) (**Table S2**),  
197 including known hydrogenotrophic acetogens *Blautia schinkii*<sup>40</sup> and *Acetitomaculum*  
198 *ruminis*<sup>41</sup>. Several subgroups of the group 1 [NiFe]-hydrogenases, all membrane-  
199 bound enzymes known to support hydrogenotrophic respiration<sup>65,78</sup>, were also  
200 detected. Most notably, various *Selenomonas*, *Mitsuokella*, and *Wolinella* strains  
201 encoded such hydrogenases together with the signature genes for fumarate reduction  
202 (*frdA*) and nitrate ammonification (*narG*, *napA*, *nrfA*). As anticipated, the group 1b  
203 [NiFe]-hydrogenase and *dsrA* gene characteristic of hydrogenotrophic sulfate  
204 reduction were also encoded in the three genomes of ruminal *Desulfovibrio* isolates  
205 (**Figure 1; Table S2**).

206

## 207 **H<sub>2</sub> is mainly produced by clostridial electron-bifurcating [FeFe]-hydrogenases** 208 **and consumed by [NiFe]-hydrogenases of methanogens and selenomonads**

209

210 We then investigated the relative abundance and expression levels of the retrieved  
211 hydrogenases in rumen communities. To do so, we used 20 pairs of metagenomes  
212 and metatranscriptomes that were previously sequenced from the rumen contents of  
213 age- and diet-matched sheep<sup>63</sup> (**Table S3**). Screening these datasets with  
214 hydrogenases retrieved from the rumen microbial reference genomes yielded 15,464  
215 metagenome hits (0.015% of all reads) and 40,485 metatranscriptome hits (0.040%)  
216 (**Table S4**). Across the metagenomes, the dominant hydrogenase reads originated  
217 from eleven subgroups (A1, A2, A3, B, 3a, 3c, 4e, 4g, 4h, 4i, Fe) (**Figure 2a & S2a**)  
218 and three taxonomic orders (Clostridiales, Methanobacteriales, Selenomonadales)  
219 (**Figure 2c & S3a**); this is concordant with the hydrogenase content in the genomes  
220 of the dominant community members<sup>63,64</sup> (**Table S2**). Metatranscriptome analysis  
221 indicated these genes were differentially expressed: whereas A3, 1d, 3a, 3c, and 4g  
222 genes were highly expressed (RNA / DNA expression ratio > 4), others were

223 expressed at moderate (A1, A2, Fe; ratio 1.5 – 2.5) or low levels (B, 4e, 4h, 4i; ratio <  
224 1.5) (**Figure S2 & S3**). Though putative nitrogenase genes (*nifH*) were detected,  
225 expression ratios were low (av. 0.45), suggesting nitrogen fixation is not a significant  
226 H<sub>2</sub> source in sheep (**Figure S4**).

227

228 Accounting for 54% of hydrogenase transcripts detected (**Figure 2b, 3a, S2**), group  
229 A3 [FeFe]-hydrogenases appear to be the primary catalysts of H<sub>2</sub> production in  
230 ruminants. We assigned the retrieved transcripts to taxa based on their closest hits to  
231 the rumen genome hydrogenase dataset (**Table S4**). Clostridia accounted for the  
232 majority of the hits (**Figure 2d**), including *Ruminococcus* (22%), *Saccharofermentans*  
233 (9.2%), and *Lachnoclostridium* (7.4%) species known to fermentatively produce H<sub>2</sub>  
234 <sup>29,33,79</sup> (**Figure S5 & S6**). Transcripts from the characterized fermentative genera  
235 *Bacteroides*, *Butyrivibrio*, *Clostridium*, and *Sarcina* were also moderately abundant. A  
236 further 21% of group A3 [FeFe]-hydrogenase hits were assigned to three  
237 uncharacterized cultured lineages within the Clostridia: Clostridiales R-7,  
238 Ruminococcaceae P7, and Lachnospiraceae YSB2008 (**Figure S5 & S6**). This is  
239 compatible with our previous studies showing unclassified microorganisms, especially  
240 from R-7 group, are abundant in rumen <sup>21</sup>. H<sub>2</sub>-evolving hydrogenases from the A1 and  
241 B subgroups were also detected, but their RNA/DNA expression ratios were threefold  
242 lower than the A3 hydrogenases. Rumen ciliates such as *Epidinium* dominated A1  
243 reads (**Figure 2d & S5**), but it is likely that their abundance in the datasets is  
244 underestimated due to the minimal genome coverage of these organisms to date.

245

246 The metatranscriptome datasets indicate that multiple H<sub>2</sub> uptake pathways operate in  
247 ruminants (**Figure 2 & 3**). In agreement with historical paradigms <sup>6</sup>, hydrogenotrophic  
248 methanogenesis appears to be the largest sink of H<sub>2</sub>; methanogens accounted for  
249 5.3% of normalized hydrogenase reads (**Figure 2d**) and methyl-CoM reductase  
250 (*mcrA*) is the most expressed of the reductases surveyed (**Figure 3c**). Consistent with  
251 their central roles in the CO<sub>2</sub>-reducing pathway of methanogenesis <sup>9</sup>, the F<sub>420</sub>-reducing  
252 [NiFe]-hydrogenase (3a) <sup>80</sup> and the heterodisulfide reductase-associated [NiFe]-  
253 hydrogenase (3c) <sup>81</sup> of *Methanobrevibacter* species were among the most transcribed  
254 of all H<sub>2</sub> uptake enzymes (**Figure 3a & S5**). In contrast, the Eha-type (4h), Ehb-type  
255 (4i), and [Fe]-hydrogenases were expressed at lower levels (**Figure 3a & S5**),  
256 reflecting their secondary roles in the physiology of methanogens <sup>82–84</sup>. There was also

257 strong evidence that hydrogenotrophic acetogenesis may be a more significant  
258 ruminal H<sub>2</sub> sink than previously recognized. Across the dataset, acetyl-CoA synthases  
259 (*acsB*; 1135 normalized reads) were expressed at a quarter of the level of methyl-CoM  
260 reductases (*mcrA*; 5246 normalized reads) (**Figure 3c**). For 74% of the reads, the  
261 closest matches were to predicted hydrogenotrophic acetogens isolated from rumen,  
262 including *Blautia*, *Acetitomaculum*, and *Oxobacter* (**Figure S8 & Table S5**).  
263 Consistently, group A2 and group A3 [FeFe]-hydrogenases from the same genera  
264 were moderately expressed in the metatranscriptomes (3.7%) (**Figure S5**). The other  
265 *acsB* reads likely originate from acetogens that use other electron donors, such as  
266 formate.

267  
268 Surprisingly, however, the most highly expressed H<sub>2</sub> uptake hydrogenase overall is  
269 the group 1d [NiFe]-hydrogenase of Selenomonadales (4.1%) (**Figure 3a, 3b & S5**).  
270 This enzyme is likely to mediate the long-known capacity of *Selenomonas* species to  
271 grow by hydrogenotrophic fumarate reduction and denitrification<sup>51,52,57</sup>. Consistently,  
272 fumarate reductases (*frdA*), nitrate reductases (*narG*), and ammonia-forming nitrite  
273 reductases (*nrfA*) homologous to those in *S. ruminantium* were expressed in the  
274 metatranscriptomes (**Figure 3c**). Normalized *nrfA* expression was fivefold higher than  
275 *narG*, suggesting selenomonads may preferentially use external nitrite; while further  
276 studies are required to determine the source of nitrite, this compound is known to  
277 accumulate in the rumen depending on nitrate content of feed<sup>85</sup>. Reads corresponding  
278 to the group 1b [NiFe]-hydrogenase, periplasmic nitrate reductase (*napA*), *nrfA*, and  
279 *frdA* from *Wolinella* was also detected, but at low levels (**Table S4 & S5; Figure S5**).  
280 Several other pathways in low abundance in the metagenome were also highly  
281 expressed, notably group 1b [NiFe]-hydrogenases and *dsrA* genes from *Desulfovibrio*  
282 species, as well as group 1i [NiFe]-hydrogenases from metabolically flexible  
283 Coriobacteriia (e.g. *Slackia*, *Denitrobacterium*) (**Figure S4 & S5**). The expression  
284 levels of the 1b and 1d hydrogenases, together with the functionally-unresolved 4g  
285 hydrogenases, were the highest of all hydrogenases in datasets (RNA / DNA ratio >  
286 10) (**Figure S3**). Though these findings need to be validated by activity-based studies,  
287 they suggest that respiratory hydrogenotrophs are highly active and quantitatively  
288 significant H<sub>2</sub> sinks in the rumen despite often being detected in low abundance<sup>5</sup>.

289

290 **Culture-based studies demonstrate that hydrogenases mediating H<sub>2</sub> production**  
291 **and uptake are differentially regulated in response to hydrogen levels**

292

293 In order to better understand how rumen bacteria regulate H<sub>2</sub> metabolism, we  
294 performed a culture-based study using *Ruminococcus albus* 7 and *Wolinella*  
295 *succinogenes* DSM 1740, a model system for interspecies hydrogen transfer<sup>25</sup>. We  
296 compared the growth, transcriptome, and extracellular metabolite profiles of these  
297 strains in either pure culture or co-culture when grown on modified fumarate-  
298 supplemented Balch medium (**Table S6**). The concentrations of the metabolites  
299 consumed and produced by the strains varied between the conditions (**Table S1**;  
300 **Figure S8**) in a manner consistent with the transcriptomic results (**Figure 4**) and  
301 historical paradigms<sup>24,25,29,53</sup>. Pathway reconstruction indicated that *R. albus*  
302 fermentatively degraded cellobiose to H<sub>2</sub>, acetate, and ethanol in pure culture (glucose  
303 + 3.3 ADP + 3.3 P<sub>i</sub> → 2.6 H<sub>2</sub> + 1.3 acetate + 0.7 ethanol + 2 CO<sub>2</sub> + 3.3 ATP<sup>29</sup>) and H<sub>2</sub>  
304 and acetate in co-culture (glucose + 4 ADP + 4 P<sub>i</sub> → 4 H<sub>2</sub> + 2 acetate + 2 CO<sub>2</sub> + 4 ATP  
305<sup>29</sup>) (**Figure 4a, 4b, 4c**). *W. succinogenes* grew by hydrogenotrophic fumarate  
306 respiration under both conditions by using exogenously supplied H<sub>2</sub> in pure culture  
307 and syntrophically-produced H<sub>2</sub> in co-culture (**Figure 4d, 4e, 4f**). Hence, *R. albus*  
308 channels fermentation through the pathway that yields stoichiometrically more ATP,  
309 H<sub>2</sub>, and acetate, provided that H<sub>2</sub> concentrations are kept sufficiently low through  
310 interspecies hydrogen transfer for this to be thermodynamically favorable.

311

312 Transcriptome profiling revealed that *R. albus* tightly regulates the expression of its  
313 three hydrogenases (**Figure 4a, 4b**). Overall, 133 genes were differentially expressed  
314 (fold change > 2, *q*-value < 0.05) in co-culture compared to pure culture (**Table S7**).  
315 Of these, the greatest fold-change was the 111-fold downregulation of a putative eight-  
316 gene cluster encoding the ferredoxin-only hydrogenase (group A1 [FeFe]-  
317 hydrogenase), a bifunctional alcohol and aldehyde dehydrogenase, and regulatory  
318 elements including a putative sensory hydrogenase (group C [FeFe]-hydrogenase)  
319 (**Figure 4a & 4b**). By suppressing expression of these enzymes, *R. albus* can divert  
320 carbon flux from ethanol production to the more energetically efficient pathway of  
321 acetate production; acetate fermentation produces equimolar levels of NADH and  
322 reduced ferredoxin, which can be simultaneously reoxidized by the electron-  
323 bifurcating hydrogenase (group A3 [FeFe]-hydrogenase) (**Figure 4c**). Glycolysis



324 enzymes and the phosphate acetyltransferase, acetate kinase, and electron-  
325 bifurcating hydrogenase of the acetate production pathway were expressed at similarly  
326 high levels under both conditions (**Figure 4a & 4b**). However, there was a significant  
327 increase in the biosynthesis of thiamine pyrophosphate, a cofactor for pyruvate  
328 dehydrogenase complex, in co-culture (**Figure 4a**).

329

330 The fermentation stoichiometries of *R. albus 7* measured in pure culture compared to  
331 co-culture (**Table 1**) were the same as we previously reported for the bacterium at high  
332 vs low concentrations of H<sub>2</sub><sup>29</sup>. This suggests that the differences in regulation are  
333 primarily determined by H<sub>2</sub> levels, rather than by direct interactions with syntrophic  
334 partners. This regulation may be achieved through direct sensing of H<sub>2</sub> by the putative  
335 sensory group C [FeFe]-hydrogenase co-transcribed with the ferredoxin-only  
336 hydrogenase and alcohol dehydrogenase (**Figure 4e**). In common with other enzymes  
337 of this class<sup>65,86,87</sup>, this enzyme contains a H-cluster for H<sub>2</sub> binding, a PAS domain for  
338 signal transfer, and a putative serine or threonine phosphatase that may modify  
339 downstream regulators. Thus, analogous to the well-studied regulatory hydrogenases  
340 of aerobic bacteria<sup>88,89</sup>, this enzyme may directly sense H<sub>2</sub> levels and induce  
341 expression of the alcohol / aldehyde dehydrogenase and ferredoxin-only hydrogenase  
342 when H<sub>2</sub> concentrations are high through a feedback loop. H<sub>2</sub> sensing may be a  
343 general mechanism regulating hydrogenase expression in ruminants, given group C  
344 [FeFe]-hydrogenases are abundant in ruminant genome (**Figure 1**), metagenome  
345 (**Figure 2a**), and metatranscriptome datasets (**Figure 2b & 3a**).

346

347 The transcriptome results also clarified understanding of hydrogenotrophic fumarate  
348 respiration by *W. succinogenes* (**Figure 4d**). In both pure culture and co-culture, the  
349 group 1b [NiFe]-hydrogenase, fumarate reductase, and F<sub>1</sub>F<sub>o</sub>-ATPase that mediate this  
350 process were expressed at high levels (**Table S7; Figure 4f**). A periplasmic  
351 asparaginase, aspartate ammonia-lyase, and dicarboxylate-binding proteins were  
352 also highly expressed; this suggests that the organism can efficiently produce and  
353 import additional fumarate from amino acid sources (**Table S7**). In total, 352 genes  
354 were significantly differentially regulated in co-culture (fold-change > 2, q-value <  
355 0.05). The respiratory hydrogenase was among the upregulated genes (**Figure 4e**),  
356 which may reflect the strain's faster growth rate in co-culture (**Table 1**). The  
357 periplasmic nitrate reductase and ammonia-forming nitrite reductase (**Figure 4f**) were



358 also induced, indicating some plasticity in oxidant usage, in line with the  
359 metatranscriptomic findings. Two formate dehydrogenases and a formate  
360 hydrogenlyase (group 4a [NiFe]-hydrogenase) were highly expressed in co-culture  
361 **(Figure 4d & 4e)**. This suggests the bacterium can potentially use formate, known to  
362 be produced through formate pyruvate lyase by *R. albus*, as an additional electron  
363 donor **(Figure 4a)**. However, the significance of these findings is unclear given no  
364 formate was detected under any condition **(Table 1)** and the expression of formate-  
365 dependent hydrogenases was extremely low in metatranscriptome datasets **(Figure**  
366 **3c)**.

367

### 368 **Hydrogenotrophic acetogenesis, fumarate reduction, and denitrification** 369 **pathways are significantly upregulated in low methane yield ruminants**

370

371 Finally, we tested whether the abundance and expression of hydrogenases and H<sub>2</sub>  
372 uptake pathways differed between high and low methane yield sheep. The current  
373 leading hypothesis, proposed on the basis of community composition<sup>68</sup>, asserts that  
374 H<sub>2</sub> production levels account for differences in methane yield between sheep. To the  
375 contrary, the expression levels of the dominant H<sub>2</sub>-evolving hydrogenases (e.g. group  
376 A3 [FeFe]-hydrogenases) and taxonomic orders (e.g. Clostridiales) were in fact  
377 extremely similar between the groups **(Figure 3a & 3b; Table S8 & S9)**.

378

379 We therefore formulated an alternative hypothesis: H<sub>2</sub> utilization through non-  
380 methanogenic pathways can reduce methane yield. In line with this hypothesis, the  
381 expression levels of the five methanogen hydrogenases and methyl-CoM reductase  
382 are significantly reduced in low methane yield sheep **(Figure 3a & 3c; Table S8 & 10)**,  
383 confirming a strong correlation with measured phenotypes **(Table S3)**. Concurrent  
384 increases in the gene expression for two major alternative H<sub>2</sub> sinks were detected,  
385 namely acetogenesis (*acsB*;  $p < 0.0001$ ) and fumarate reduction (*frdA*;  $p = 0.002$ )  
386 **(Figure 3c; Table S10)**, concomitant with significant increases in the expression levels  
387 of *Blautia* and *Selenomonas* hydrogenases **(Figure S5)**. Expression levels of *nrfA*  
388 were also on average 1.8-fold higher in low methane yield sheep, though there was  
389 much inter-sample variation in the read count for this gene. Whereas there are more  
390 transcripts of *mcrA* than other terminal reductases combined in high methane yield  
391 sheep, the transcript levels of *acsB* and *nrfA* together exceed those of *mcrA* in low

392 methane yield sheep. Depending to what extent expression levels predict activity,  
393 hydrogenotrophic acetogens and selenomonads may therefore be more active than  
394 methanogens in low methane yield sheep and may significantly limit substrate supply  
395 for methanogenesis. Two other potential H<sub>2</sub> sinks are also upregulated in the low  
396 methane yield sheep: the putative group 1i [NiFe]-hydrogenase of *Coriobacteriia* and,  
397 consistent with previous observations<sup>64</sup>, the functionally-unresolved group A2 [FeFe]-  
398 hydrogenase of *Sharpea*, *Olsenella*, and *Oribacterium* (**Figure 3a, 3b, S5**).

399

## 400 Discussion

401

402 To summarize, H<sub>2</sub> metabolism is a more widespread and complex process in  
403 ruminants than previously realized. Together, the genomic, metagenomic, and  
404 metatranscriptomic surveys suggest that multiple orders of bacteria, archaea, and  
405 eukaryotes encode and express enzymes mediating H<sub>2</sub> production and consumption  
406 in the rumen. We infer that fermentative Clostridia are the main source of H<sub>2</sub> in the  
407 rumen, which largely agrees with findings from activity-based and culture-based  
408 studies<sup>6,25,26,29</sup>. However, a surprising finding is that uncharacterized lineages within  
409 the Clostridia account for a large proportion of hydrogenase reads, emphasizing the  
410 need for physiological and bacteriological characterization of these organisms. Further  
411 studies are also needed to better account for the role of rumen ciliates and fungi, which  
412 to date are underrepresented in genomic datasets.

413

414 One of the most important findings of this work is that the recently-characterized  
415 electron-bifurcating hydrogenases appear to primarily mediate ruminal H<sub>2</sub> production.  
416 These enzymes are highly upregulated compared to ferredoxin-only hydrogenases *in*  
417 *situ* and constitute over half of hydrogenase reads in metatranscriptomes. We provide  
418 a rationale for this finding by showing that *Ruminococcus albus*, a dominant H<sub>2</sub>  
419 producer within the rumen, expresses its electron-bifurcating hydrogenase and  
420 suppresses its ferredoxin-only hydrogenase when grown syntrophically with *Wolinella*  
421 *succinogenes*. In this condition, H<sub>2</sub> concentrations remain sufficiently low that the  
422 fermentation pathway producing higher levels of ATP, H<sub>2</sub>, and acetate remains  
423 thermodynamically favorable. In the rumen, where tight coupling of hydrogenogenic  
424 and hydrogenotrophic processes usually keeps H<sub>2</sub> at sub-micromolar concentrations

425 <sup>45</sup>, Clostridia will also preferentially oxidize carbohydrates through higher ATP-yielding  
426 pathways and reoxidize the NAD and ferredoxin reduced using the electron-bifurcating  
427 hydrogenase. It is likely that the ferredoxin-only hydrogenases are preferentially  
428 upregulated during the transient periods where H<sub>2</sub> levels are high, for example  
429 immediately after feeding <sup>45</sup>. Based on these findings and previously published results  
430 <sup>29,65,86,87</sup>, we propose that the hydrogenases and fermentation pathways are  
431 differentially regulated as a result of direct H<sub>2</sub> sensing by putative sensory [FeFe]-  
432 hydrogenases.

433

434 The other major finding of this work is that there are multiple highly active H<sub>2</sub> sinks in  
435 the rumen. We provide evidence, based on transcript levels of their hydrogenases and  
436 terminal reductases, that acetogens (*Blautia*, *Acetitomaculum*), fumarate reducers and  
437 denitrifiers (*Selenomonas*, *Wolinella*), and sulfate reducers (*Desulfovibrio*) are  
438 quantitatively significant H<sub>2</sub> sinks in sheep. In support of these findings, our culture-  
439 based study confirmed that the enzymes mediating hydrogenotrophic fumarate  
440 reduction and potentially nitrate ammonification are highly expressed by *W.*  
441 *succinogenes* in co-culture with *R. albus*. While alternative H<sub>2</sub> uptake pathways have  
442 been previously detected *in vitro* <sup>40,41,49–52,56,57</sup>, it has generally been assumed that  
443 they are quantitatively insignificant compared to hydrogenotrophic methanogenesis  
444 <sup>5,6,45</sup>. To the contrary, hydrogenase and terminal reductase transcripts from alternative  
445 H<sub>2</sub> uptake pathways are more numerous than those of methanogens in low methane  
446 yield sheep, and hence these pathways may collectively serve as a larger H<sub>2</sub> sink than  
447 methanogenesis under some circumstances. These findings justify activity-based  
448 studies to quantify H<sub>2</sub> flux within ruminants between the pathways. There is also  
449 evidence of other novel pathways operating in the rumen, mediated by the functionally  
450 unresolved group 1i [NiFe]-hydrogenases (*Slackia*, *Denitrobacterium*), group 4g  
451 [NiFe]-hydrogenase (*Clostridium*), and group A2 [FeFe]-hydrogenases (*Sharpea*,  
452 *Oribacterium*, *Olsenella*).

453

454 The strong correlation between H<sub>2</sub> uptake pathways and methane yield phenotypes  
455 suggests that modulating H<sub>2</sub> metabolism may be an effective methane mitigation  
456 strategy. One strategy is to develop inhibitors that redirect electron flux from H<sub>2</sub>  
457 production towards volatile fatty acid production. However, given the central role of H<sub>2</sub>  
458 metabolism in the physiology and ecology of most rumen microorganisms, this would

459 be challenging to achieve without compromising rumen function and consequently  
460 ruminant nutrition. Furthermore, such strategies may have a converse effect on  
461 methane production, given lower H<sub>2</sub> concentrations restrict acetogens more than  
462 methanogens<sup>45</sup>. Instead, our metatranscriptome analyses suggest a more promising  
463 approach may be to stimulate alternative H<sub>2</sub> pathways such as fumarate, nitrate, and  
464 sulfate respiration. Selective breeding of low methane yield sheep is an option, given  
465 methane yield and in turn metatranscriptome profiles have been shown to be a  
466 quantitative heritable trait to some extent<sup>63,90</sup>. However, the similar metagenome  
467 profiles between the sheep, combined with the metatranscriptome profiles of the  
468 phenotype-switching sheep, indicate alternative H<sub>2</sub> uptake pathways are also  
469 inducible. Another solution may be to supplement animal feeds with electron  
470 acceptors, such as fumarate, nitrate, or sulfate, that stimulate the dominant respiratory  
471 hydrogenotrophs. Such approaches have shown some promise in mitigating methane  
472 production both *in vitro*<sup>91-93</sup> and in field trials<sup>61,62,94,95</sup>. These strategies may  
473 complement methanogenesis inhibitors<sup>16,17</sup> by facilitating the redirection of H<sub>2</sub> flux  
474 from methanogens to other pathways.

475

## 476 **Materials and Methods**

477

### 478 **Comparative genomic analysis**

479 The protein sequences of the 501 genomes of cultured rumen bacteria (410 from  
480 Hungate Collection<sup>21</sup>, 91 from other sources) were retrieved from the Joint Genome  
481 Institute (JGI) genome portal. These sequences were then screened against local  
482 protein databases for the catalytic subunits of the three classes of hydrogenases  
483 (NiFe-hydrogenases, FeFe-hydrogenases, Fe-hydrogenases), nitrogenases (NifH),  
484 methyl-CoM reductases (McrA), acetyl-CoA synthases (AcsB), adenylylsulfate  
485 reductases (AprA), dissimilatory sulfite reductases (DsrA), alternative sulfite  
486 reductases (AsrA), fumarate reductases (FrdA), dissimilatory nitrate reductases  
487 (NarG), periplasmic nitrate reductases (NapA), ammonia-forming nitrite reductases  
488 (NrfA), DMSO / TMAO reductases (DmsA), and cytochrome *bd* oxidases (CydA).  
489 Hydrogenases were screened using the HydDB dataset<sup>66,96</sup>, targeted searches were  
490 used to screen six protein families (AprA, AsrA, NarG, NapA, NrfA, DmsA, CydA), and  
491 comprehensive custom databases were constructed to screen five other protein

492 families (NifH, McrA, AcsB, DsrA, FrdA) based on their total reported genetic diversity  
493 <sup>97–101</sup>. A custom Python script incorporating the Biopython package <sup>102</sup> for producing  
494 and parsing BLAST results was used to batch-submit the protein sequences of the  
495 501 downloaded genomes as queries for BLAST searches against the local  
496 databases. Specifically, hits were initially called for alignments with an e-value  
497 threshold of 1e-50 and the resultant XML files were parsed. Alignments producing hits  
498 were further filtered for those with coverage values exceeding 90% and percent  
499 identity values of 30% to 70%, depending on the target, and hits were subsequently  
500 manually curated. **Table S1** provides the FASTA protein sequences and alignment  
501 details of the filtered hits. For hydrogenases, the protein sequences flanking the  
502 hydrogenase large subunits were also retrieved; these sequences were used to  
503 classify group A [FeFe]-hydrogenases into subtypes (A1 to A4), as previously  
504 described <sup>96</sup>, and retrieve diaphorase sequences (HydB) associated with the A3  
505 subtype. Partial [FeFe]-hydrogenase protein sequences from six incompletely  
506 sequenced rumen ciliates and fungi genomes were retrieved through targeted blastP  
507 searches <sup>103</sup> in NCBI.

508

### 509 **Metagenomic and metatranscriptomic analysis**

510 We analyzed previously published datasets of twenty paired metagenomes and  
511 metatranscriptomes of sheep rumen contents <sup>63</sup>. All profiles were derived from the  
512 rumen contents of age-matched, pelleted lucerne-fed rams that were collected four  
513 hours after morning feeding and subject to paired-end sequencing on the HiSeq 2000  
514 platform <sup>63</sup>. The samples were taken from ten rams at two different sampling dates  
515 based on their measured methane yields <sup>63,90</sup>; four rams were consistently low yield,  
516 four were consistently high yield, and two others switched in methane yield between  
517 the sampling dates (**Table S3**). The metagenome and metatranscriptome datasets  
518 analyzed are accessible at the NCBI Sequence Read Archive (SRA;  
519 <http://www.ncbi.nlm.nih.gov/sra>) accession numbers SRA075938, and SRX1079958 -  
520 SRX1079985 under bioproject number PRJNA202380. Each metagenome and  
521 metatranscriptome was subsampled to an equal depth of 5 million reads using seqtk  
522 (<https://github.com/lh3/seqtk>) seeded with parameter -s100. Subsampled datasets  
523 were then screened in DIAMOND (default settings, one maximum target sequence per  
524 query) <sup>104</sup> using the protein sequences retrieved from the 507 rumen microbial  
525 genomes (NiFe-hydrogenases, FeFe-hydrogenases, Fe-hydrogenases, HydB, NifH,

526 McrA, AcsB, AprA, DsrA, AsrA, FrdA, NarG, NapA, NrfA, DmsA, CydA). Results were  
527 then filtered (length of amino acid > 40 residues, sequence identity > 65%). Subgroup  
528 classification and taxonomic assignment of the hydrogenase reads was based on their  
529 closest match to the hydrogenase dataset derived from the 507 genomes at either  
530 65% or 85% identity. The number of reads with the rumen-specific hydrogenase  
531 dataset (15464 metagenome hits, 40485 metatranscriptome hits) exceeded those  
532 obtained by screening with the generic dataset from HydDB <sup>66</sup> (12599 metagenome  
533 reads, 31155 metatranscriptome reads), verifying the rumen dataset comprehensively  
534 captures hydrogenase diversity. For each dataset, read count was normalized to  
535 account for the average length of each gene using the following formula: Normalized  
536 Read Count = Actual Read Count × (1000 / Average Gene Length). Independent two-  
537 group Wilcoxon rank-sum tests were used to determine whether there were significant  
538 differences in the targets analyzed between low and high methane yield sheep.  
539 Separate analyses were performed based on gene abundance, transcript abundance,  
540 and RNA/DNA ratio.

541

#### 542 **Bacterial growth conditions and quantification**

543 The bovine rumen isolates *Ruminococcus albus* 7 <sup>67</sup> and *Wolinella succinogenes* DSM  
544 1740 <sup>53</sup> were cultured anaerobically at 37°C in modified Balch medium <sup>105</sup> (**Table S6**).  
545 Pre-cultures were grown in Balch tubes (18 × 150 mm; Chemglass Life Sciences,  
546 Vineland, NJ) containing 20% v/v culture medium and sealed with butyl rubber  
547 stoppers crimped with aluminium caps. Cultures were grown in Pyrex side-arm flasks  
548 (Corning Inc., Corning, NY) containing 118 mL modified Balch medium. Two pre-  
549 cultures were grown before final inoculation, and all inoculum transfers were 5% (v/v).  
550 The headspace consisted of 20% CO<sub>2</sub> and 80% N<sub>2</sub> for *R. albus* pure cultures and the  
551 co-cultures, and 20% CO<sub>2</sub> and 80% H<sub>2</sub> for *W. succinogenes* pure cultures. Cultures  
552 were periodically sampled at 0, 3, 5, 7, 9, and 11 h for metabolite analysis and bacterial  
553 quantification. Culture samples were immediately centrifuged (16,000 × *g*, 10 min) in  
554 a bench-top centrifuge (Eppendorf, Hamburg, Germany). For metabolite analysis, the  
555 supernatant was collected and further centrifuged (16,000 × *g*, 10 min) before HPLC  
556 analysis. For bacterial quantification, DNA was extracted from each pellet using the  
557 Fungal/Bacterial DNA MiniPrep kit according to the manufacturer's instructions (Zymo  
558 Research, Irvine, CA). Quantitative PCR (qPCR) was used to quantify the number of  
559 copies of the Rumal\_2867 (*R. albus* glucokinase gene; FW:



560 CTGGGATTCCTGAACTTTCC; RV: ATGCATACTGCGTTAG) and WS0498 (*W.*  
561 *succinogenes* *flgL* gene; FW: CAGACTATACCGATGCAACTAC; RV:  
562 GAGCGGAGGAGATCTTTAATC) against pGEM-T-Easy standards of each gene of  
563 known concentration. DNA was quantified using the iTaq Universal SYBR Green Mix  
564 (Bio-Rad) using a LightCycler 480 (Roche Holding AG, Basel, Switzerland).

565

### 566 **Liquid and gas metabolite analysis**

567 The concentrations of acetate, ethanol, fumarate, succinate, and formate in the culture  
568 supernatants were analyzed using an Ultra-Fast Liquid Chromatograph (UFLC;  
569 Shimadzu, Kyoto, Japan). The UFLC consisted of a DGU-20A5 degasser, a SIL-  
570 20A-CHT autosampler, an LC-20AT solvent delivery unit, an RID-10A refractive index  
571 detector, a CBM-20A system controller, and a CTO-20AC column oven. The mobile  
572 phase was 5 mM H<sub>2</sub>SO<sub>4</sub> passed through an Aminex HPX-87H ion exclusion column  
573 (Bio-Rad, Hercules, CA) at a flow rate of 0.4 mL min<sup>-1</sup>, 25°C. Each culture was also  
574 sampled at 0 h and 24 h to analyze H<sub>2</sub> percentage mixing ratios using a gas  
575 chromatograph (GC; Gow-Mac Series 580 Thermal Conductivity Gas Chromatograph,  
576 Gow-Mac Instrument Co., Bethlehem, PA). Samples were withdrawn directly from the  
577 culture tube in a gas-tight syringe and 0.5 mL was injected into GC for analysis using  
578 N<sub>2</sub> as the carrier gas. The flow rate was 60 mL min<sup>-1</sup>, the detector was set to 80°C, the  
579 injector was set to 80°C, and the oven was set to 75°C. For both liquid and gas  
580 analyses, peak retention times and peak area were compared to standards of known  
581 concentration.

582

### 583 **RNA extraction and sequencing**

584 Each pure culture and co-culture used for transcriptome analysis was grown in  
585 duplicate in Balch tubes. Growth was monitored until the cultures were in mid-  
586 exponential phase; the change in OD<sub>600</sub> at this phase was 0.14 for *W. succinogenes*,  
587 0.20 for *R. albus*, and 0.35 for the co-culture. At mid-exponential phase, 5 mL cultures  
588 were harvested by centrifugation (13,000 x *g*, 4°C). Cell pellets were resuspended in  
589 400 µL fresh lysis buffer (5 mM EDTA, 0.5% SDS, 25 mM lysozyme, 250 U mL<sup>-1</sup>  
590 mutanolysin, and 150 µg mL<sup>-1</sup> proteinase K in 25 mM sodium phosphate buffer, pH  
591 7.0) and incubated 30 minutes at 55°C with periodic vortexing. RNA was subsequently  
592 extracted using an RNeasy Mini Kit following the manufacturer's protocol, including all  
593 optional steps (Qiagen, Hilden, Germany) and eluted with 50 µL ultra-pure DEPC-



594 treated water (Invitrogen, Carlsbad, CA). RNA quantity, quality, and integrity were  
595 confirmed by Qubit Fluorometry (Invitrogen, Carlsbad, CA), Nanodrop UV-Vis  
596 Spectrophotometry (Thermo Fisher Scientific, model 2300c), and agarose gel  
597 electrophoresis respectively. Bacterial rRNA was removed from 1 µg of total RNA with  
598 the MicroExpress Kit (Life Technologies, Carlsbad, CA). Libraries were prepared on  
599 the enriched mRNA fraction using the Tru-Seq Stranded RNA Sample Prep Kit  
600 (Illumina, San Diego, CA). The barcoded libraries were pooled in equimolar  
601 concentration the pool and sequenced on one lane for 101 cycles on a HiSeq2000  
602 using a TruSeq SBS Sequencing Kit (Version 3). Fastq files were generated and  
603 demultiplexed with the bc12fastq Conversion Software (Illumina, version 1.8.4). The  
604 RNA-seq data were analyzed using CLC Genomics Workbench version 5.5.1 (CLC  
605 Bio, Cambridge, MA). RNA-seq reads were mapped onto the reference genome  
606 sequences of *Ruminococcus albus* 7<sup>106</sup> and *Wolinella succinogenes* DSM 1740<sup>107</sup>  
607 **(Table S7 & S11)**. The RNA-seq output files were analyzed for statistical significance  
608 as described<sup>108</sup> and q-values were generated using the qvalue package in R<sup>109</sup>.  
609 Predicted subsystems and functions were downloaded and aligned to the RNA-seq  
610 transcriptional data using the RAST Server<sup>110</sup>.

611

## 612 **Footnotes**

613 Acknowledgements: This study was funded by the New Zealand Government to  
614 support the objectives of the Livestock Research Group of the Global Research  
615 Alliance on Agricultural Greenhouse Gases *via* a grant from the New Zealand Fund  
616 for Global Partnerships in Livestock Emissions Research (SOW14-GPLER4-AGR-  
617 SP6; awarded to G.T.A., S.C.L., W.J.K., R.M., S.K., and G.M.C.). Transcriptomic and  
618 metabolic research on the co-cultures was supported by the Agriculture and Food  
619 Research Initiative competitive grant 2012-67015-19451 from the USDA National  
620 Institute of Food and Agriculture (awarded to R.I.M. and I.C.). The study was also  
621 supported by an ARC DECRA Fellowship (DE170100310; awarded to C.G.), an ARC  
622 Future Fellowship (FT170100441; awarded to M.J.M.), and PhD scholarships  
623 awarded by the University of Otago (C.W.) and Monash University (L.C.W.).

624

625 Author contributions: G.M.C., R.I.M., G.T.A., I.C., S.C.L., W.J.K., S.K., and C.G.  
626 conceived this study. C.G., R.I.M., G.M.C., I.C., S.E.M., M.J.M., and X.C.M. designed

627 research, supervised students, and analyzed data. C.G., L.C.W., M.J.M., and S.C.L.  
628 performed the comparative genomic analysis. C.G., C.W., S.E.M., G.M.C., R.R.G.,  
629 G.T.A., W.J.K., S.C.L., and X.C.M. performed the metagenomic and  
630 metatranscriptomic analysis. R.G. performed the co-culture experiments and R.G.,  
631 R.I.M., I.C., and C.G. analyzed the results. C.G. wrote and illustrated the paper with  
632 input from all authors.

633

634 The authors declare no conflict-of-interest.

## 635 **Figures**

636 **Figure 1. Heatmap showing distribution of enzymes mediating H<sub>2</sub> production**  
637 **and H<sub>2</sub> consumption in orders of rumen microorganisms.** Results are shown  
638 based on screens of the 501 genomes of cultured rumen bacteria and archaea (410  
639 from the Hungate collection plus 91 other genomes). Partial hydrogenase sequences  
640 were also retrieved and classified from four rumen ciliates and two rumen fungi. The  
641 left-hand side of the heatmap shows the distribution of the catalytic subunits of  
642 enzymes that catalyze H<sub>2</sub> oxidation and production. These are divided into  
643 fermentative hydrogenases (H<sub>2</sub>-producing; group A1, A2, B FeFe-hydrogenases),  
644 bifurcating hydrogenases (bidirectional; group A3, A4 FeFe-hydrogenases),  
645 respiratory hydrogenases (H<sub>2</sub>-uptake; group 1b, 1c, 1d, 1f, 1i, 2d NiFe-hydrogenases),  
646 methanogenic hydrogenases (H<sub>2</sub>-uptake; group 1k, 3a, 3c, 4h, 4i NiFe-hydrogenases,  
647 Fe-hydrogenases), energy-converting hydrogenases (bidirectional; group 4a, 4c, 4e,  
648 4f, 4g NiFe-hydrogenases), sensory hydrogenases (group C FeFe-hydrogenases),  
649 and nitrogenases (H<sub>2</sub>-producing; NifH). The right-hand side shows the distribution of  
650 the catalytic subunits of key reductases in H<sub>2</sub> consumption pathways. They are genes  
651 for methanogenesis (McrA, methyl-CoM reductase), acetogenesis (AcsB, acetyl-CoA  
652 synthase), sulfate reduction (DsrA, dissimilatory sulfite reductase; AprA,  
653 adenylylsulfate reductase; AsrA, alternative sulfite reductase), fumarate reduction  
654 (FrdA, fumarate reductase), nitrate ammonification (NarG, dissimilatory nitrate  
655 reductase; NapA, periplasmic nitrate reductase; NrfA, ammonia-forming nitrite  
656 reductase), dimethyl sulfoxide and trimethylamine *N*-oxide reduction (DmsA, DMSO  
657 and TMAO reductase), and aerobic respiration (CydA, cytochrome *bd* oxidase). Only  
658 hydrogenase-encoding orders are shown. **Table S2** shows the distribution of these  
659 enzymes by genome, **Figure S1** depicts hydrogenase subgroup distribution by class,  
660 and **Table S1** lists the FASTA sequences of the retrieved reads.

661

662 **Figure 2. Hydrogenase content in the metagenomes and metatranscriptomes of**  
663 **the microbial communities within rumen contents of high and low methane yield**  
664 **sheep.** Hydrogenase content is shown based on hydrogenase subgroup (a, b) and  
665 predicted taxonomic affiliation (c, d) for metagenome datasets (a, c) and  
666 metatranscriptome datasets (b, d). Hydrogenase-encoding sequences were retrieved  
667 from 20 paired shotgun metagenomes and metatranscriptomes randomly subsampled  
668 at five million reads. Reads were classified into hydrogenase subgroups and  
669 taxonomically assigned at the order level based on their closest match to the  
670 hydrogenases within the genomes screened (**Figure 1**). L01 to L10 are datasets for  
671 sheep that were low methane yield at time of sampling, H01 to H20 are datasets from  
672 sheep that were high methane yield at time of sampling (see **Table S3** for full details).  
673

674 **Figure 3. Comparison of expression levels of H<sub>2</sub> production and H<sub>2</sub> uptake**  
675 **pathways in low and high methane yield sheep.** Results are shown for ten  
676 metatranscriptome datasets each from low methane yield sheep (orange) and high  
677 methane yield sheep (blue) that were randomly subsampled at five million reads. (a)  
678 Normalized count of hydrogenase transcript reads based on hydrogenase subgroup.  
679 (b) Normalized count of hydrogenase transcript reads based on predicted taxonomic  
680 affiliation. (c) Normalized count of transcript reads of key enzymes involved in H<sub>2</sub>  
681 production and H<sub>2</sub> consumption, namely the catalytic subunits of [NiFe]-hydrogenases  
682 (NiFe), [FeFe]-hydrogenases (FeFe), [Fe]-hydrogenases (Fe), hydrogenase-  
683 associated diaphorases (HydB), nitrogenases (NifH), methyl-CoM reductases (McrA),  
684 acetyl-CoA synthases (AcsB), adenylylsulfate reductases (AprA), dissimilatory sulfite  
685 reductases (DsrA), alternative sulfite reductases (AsrA), fumarate reductases (FrdA),  
686 dissimilatory nitrate reductases (NarG), periplasmic nitrate reductases (NapA),  
687 ammonia-forming nitrite reductases (NrfA), DMSO / TMAO reductases (DmsA), and  
688 cytochrome *bd* oxidases (CydA) are provided. For FrdA, NrfA, and CydA, the  
689 numerous reads from non-hydrogenotrophic organisms (e.g. Bacteroidetes) were  
690 excluded. Each boxplot shows the ten datapoints and their range, mean, and quartiles.  
691 Significance was tested using independent two-group Wilcoxon rank-sum tests (\*  $p <$   
692 0.05; \*\*  $p <$  0.01; \*\*\*  $p <$  0.001; \*\*\*\*  $p <$  0.0001; full  $p$  values in **Table S8**, **Table S9**  
693 and **Table S10**). Note the metagenome abundance and RNA / DNA ratio of these  
694 genes is shown in **Figure S2** (hydrogenase subgroup), **Figure S3** (hydrogenase  
695 taxonomic affiliation), and **Figure S4** (H<sub>2</sub> uptake pathways). A full list of metagenome  
696 and metatranscriptome hits is provided for hydrogenases in **Table S4** and H<sub>2</sub> uptake  
697 pathways in **Table S5**.

698

699 **Figure 4. Comparison of whole genome expression levels of *Ruminococcus***  
700 ***albus* and *Wolinella succinogenes* in pure culture and co-culture.** Pure cultures  
701 and co-cultures of *Ruminococcus albus* 7 (a, b, c) and *Wolinella succinogenes* DSM  
702 1740 (d, e, f) were harvested in duplicate during mid-exponential phase and subject  
703 to RNA sequencing. (a & d) Volcano plots of the ratio of normalized average transcript  
704 abundance for co-cultures over pure cultures. Each gene is represented by a grey dot  
705 and key metabolic genes, including hydrogenases, are highlighted as per the legend.  
706 (b & d) Predicted operon structure of the three hydrogenases of *R. albus* and two  
707 hydrogenases of *W. succinogenes*. (e) Comparison of dominant fermentation  
708 pathways of *R. albus* in pure culture (left) and co-culture (right) based on transcriptome  
709 reads and metabolite profiling. The three enzymes downregulated in co-culture are in  
710 red font. (f) Respiratory chain composition of *W. succinogenes* in pure culture and co-  
711 culture based on transcriptome reads. Metabolite profiling indicated that the  
712 respiratory hydrogenase and fumarate reductases were active in both conditions. A  
713 full list of read counts and expression ratios for each gene is provided in **Table S**

714 **Table 1. Comparison of growth parameters and metabolite profiles of**  
 715 ***Ruminococcus albus* and *Wolinella succinogenes* in pure culture and co-**  
 716 **culture.** Growth of pure cultures and co-cultures of *Ruminococcus albus* 7 and  
 717 *Wolinella succinogenes* DSM 1740 was monitored by qPCR. Values show means  $\pm$   
 718 standard deviations of three biological replicates. Also shown is the change in  
 719 extracellular pH, percentage hydrogen gas (measured by gas chromatography), and  
 720 concentrations of fumarate, succinate, acetate, ethanol, and formate (measured by  
 721 ultra-fast liquid chromatography) between 0 hours and 12 hours. Growth media was  
 722 the same between the three conditions, except 80% H<sub>2</sub> was added for *W.*  
 723 *succinogenes* growth, whereas no H<sub>2</sub> was added for the other conditions. Full liquid  
 724 metabolite measurements are shown in **Figure S8**. BDL = below detection limit.

725

|                                                           | <i>Ruminococcus albus</i> | <i>Wolinella succinogenes</i> | Co-culture                                                     |
|-----------------------------------------------------------|---------------------------|-------------------------------|----------------------------------------------------------------|
| <b>Growth parameters</b>                                  |                           |                               |                                                                |
| Growth yield (OD <sub>600</sub> )                         | 0.79 $\pm$ 0.01           | 0.36 $\pm$ 0.01               | 0.93 $\pm$ 0.01                                                |
| Specific growth rate (h <sup>-1</sup> )                   | 0.58 $\pm$ 0.19           | 0.33 $\pm$ 0.06               | 0.57 $\pm$ 0.34 ( <i>Ra</i> )<br>0.54 $\pm$ 0.11 ( <i>Ws</i> ) |
| <b>Concentration changes of extracellular metabolites</b> |                           |                               |                                                                |
| Hydrogen (%)                                              | +5.3                      | -78.4                         | BDL                                                            |
| Fumarate (mM)                                             | -5.5                      | -46.3                         | -43.1                                                          |
| Succinate (mM)                                            | +2.2                      | +54.6                         | +55.4                                                          |
| Acetate (mM)                                              | +21.8                     | 0                             | +32.4                                                          |
| Ethanol (mM)                                              | +8.7                      | 0                             | +0.3                                                           |
| Formate (mM)                                              | BDL                       | BDL                           | BDL                                                            |
| pH                                                        | -0.4                      | -0.4                          | -0.6                                                           |

726



## 727 **References**

- 728 1. Kirschke, S. *et al.* Three decades of global methane sources and sinks. *Nat.*  
729 *Geosci* **6**, 813–823 (2013).
- 730 2. Beijer, W. H. Methane fermentation in the rumen of cattle. *Nature* **170**, 576  
731 (1952).
- 732 3. Whitford, M. F., Teather, R. M. & Forster, R. J. Phylogenetic analysis of  
733 methanogens from the bovine rumen. *BMC Microbiol.* **1**, 5 (2001).
- 734 4. Wright, A.-D. G. *et al.* Molecular diversity of rumen methanogens from sheep  
735 in Western Australia. *Appl. Environ. Microbiol.* **70**, 1263–1270 (2004).
- 736 5. Henderson, G. *et al.* Rumen microbial community composition varies with diet  
737 and host, but a core microbiome is found across a wide geographical range.  
738 *Sci. Rep.* **5**, 14567 (2015).
- 739 6. Hungate, R. E. Hydrogen as an intermediate in the rumen fermentation. *Arch.*  
740 *Mikrobiol.* **59**, 158–164 (1967).
- 741 7. Hungate, R. E., Smith, W., Bauchop, T., Yu, I. & Rabinowitz, J. C. Formate as  
742 an intermediate in the bovine rumen fermentation. *J. Bacteriol.* **102**, 389–397  
743 (1970).
- 744 8. Thauer, R. K. The Wolfe cycle comes full circle. *Proc. Natl. Acad. Sci. U. S. A.*  
745 **109**, 15084–15085 (2012).
- 746 9. Leahy, S. C. *et al.* The genome sequence of the rumen methanogen  
747 *Methanobrevibacter ruminantium* reveals new possibilities for controlling  
748 ruminant methane emissions. *PLoS One* **5**, e8926 (2010).
- 749 10. Kelly, W. J. *et al.* The complete genome sequence of the rumen methanogen  
750 *Methanobacterium formicicum* BRM9. *Stand. Genomic Sci.* **9**, 15 (2014).
- 751 11. Lambie, S. C. *et al.* The complete genome sequence of the rumen  
752 methanogen *Methanosarcina barkeri* CM1. *Stand. Genomic Sci.* **10**, 57 (2015).
- 753 12. Li, Y. *et al.* The complete genome sequence of the methanogenic archaeon  
754 ISO4-H5 provides insights into the methylotrophic lifestyle of a ruminal  
755 representative of the Methanomassiliicoccales. *Stand. Genomic Sci.* **11**, 59  
756 (2016).
- 757 13. Martin, C., Morgavi, D. P. & Doreau, M. Methane mitigation in ruminants: from  
758 microbe to the farm scale. *Animal* **4**, 351–365 (2010).
- 759 14. Buddle, B. M. *et al.* Strategies to reduce methane emissions from farmed

- 760 ruminants grazing on pasture. *Vet. J.* **188**, 11–17 (2011).
- 761 15. Wedlock, D. N., Janssen, P. H., Leahy, S. C., Shu, D. & Buddle, B. M.  
762 Progress in the development of vaccines against rumen methanogens. *Animal*  
763 **7**, 244–252 (2013).
- 764 16. Hristov, A. N. *et al.* An inhibitor persistently decreased enteric methane  
765 emission from dairy cows with no negative effect on milk production. *Proc.*  
766 *Natl. Acad. Sci.* **112**, 10663–10668 (2015).
- 767 17. Henderson, G., Cook, G. M. & Ronimus, R. S. Enzyme-and gene-based  
768 approaches for developing methanogen-specific compounds to control  
769 ruminant methane emissions: a review. *Anim. Prod. Sci.* **58**, 1017–1026  
770 (2018).
- 771 18. Weimar, M. R. *et al.* Development of multi-well plate methods using pure  
772 cultures of methanogens to identify new inhibitors for suppressing ruminant  
773 methane emissions. *Appl. Environ. Microbiol.* **83**, e00396-17 (2017).
- 774 19. Morgavi, D. P., Forano, E., Martin, C. & Newbold, C. J. Microbial ecosystem  
775 and methanogenesis in ruminants. *Animal* **4**, 1024–1036 (2010).
- 776 20. Malik, P. K. *et al.* in *Climate Change Impact on Livestock: Adaptation and*  
777 *Mitigation* 303–320 (Springer, 2015).
- 778 21. Seshadri, R. *et al.* Cultivation and sequencing of rumen microbiome members  
779 from the Hungate1000 Collection. *Nat. Biotechnol.* **36**, 359 (2018).
- 780 22. Solden, L. M. *et al.* Interspecies cross-feeding orchestrates carbon  
781 degradation in the rumen ecosystem. *Nat. Microbiol.* **3**, 1274 (2018).
- 782 23. Stewart, R. D. *et al.* Assembly of 913 microbial genomes from metagenomic  
783 sequencing of the cow rumen. *Nat. Commun.* **9**, 870 (2018).
- 784 24. Miller, T. L. & Wolin, M. J. Formation of hydrogen and formate by  
785 *Ruminococcus albus*. *J. Bacteriol.* **116**, 836–846 (1973).
- 786 25. Iannotti, E. L., Kafkewitz, D., Wolin, M. J. & Bryant, M. P. Glucose fermentation  
787 products of *Ruminococcus albus* grown in continuous culture with *Vibrio*  
788 *succinogenes*: changes caused by interspecies transfer of H<sub>2</sub>. *J. Bacteriol.*  
789 **114**, 1231–1240 (1973).
- 790 26. Varel, V. H. Reisolation and characterization of *Clostridium longisporum*, a  
791 ruminal sporeforming cellulolytic anaerobe. *Arch. Microbiol.* **152**, 209–214  
792 (1989).
- 793 27. Scheifinger, C. C., Linehan, B. & Wolin, M. J. H<sub>2</sub> production by *Selenomonas*

- 794 *ruminantium* in the absence and presence of methanogenic bacteria. *Appl.*  
795 *Microbiol.* **29**, 480–483 (1975).
- 796 28. Hino, T., Miyazaki, K. & Kuroda, S. Role of extracellular acetate in the  
797 fermentation of glucose by a ruminal bacterium, *Megasphaera elsdenii*. *J. Gen.*  
798 *Appl. Microbiol.* **37**, 121–129 (1991).
- 799 29. Zheng, Y., Kahnt, J., Kwon, I. H., Mackie, R. I. & Thauer, R. K. Hydrogen  
800 formation and its regulation in *Ruminococcus albus*: involvement of an  
801 electron-bifurcating [FeFe]-hydrogenase, of a non-electron-bifurcating [FeFe]-  
802 hydrogenase, and of a putative hydrogen-sensing [FeFe]-hydrogenase. *J.*  
803 *Bacteriol.* **196**, 3840–3852 (2014).
- 804 30. Gutierrez, J. & Davis, R. E. Culture and metabolism of the rumen ciliate  
805 *Epidinium ecaudatum* Crawley. *Appl. Microbiol.* **10**, 305–308 (1962).
- 806 31. Bauchop, T. & Mountfort, D. O. Cellulose fermentation by a rumen anaerobic  
807 fungus in both the absence and the presence of rumen methanogens. *Appl.*  
808 *Environ. Microbiol.* **42**, 1103–1110 (1981).
- 809 32. Li Pun, H. H. & Satter, L. D. Nitrogen fixation in ruminants. *J. Anim. Sci.* **41**,  
810 1161–1163 (1975).
- 811 33. Latham, M. J. & Wolin, M. J. Fermentation of cellulose by *Ruminococcus*  
812 *flavofaciens* in the presence and absence of *Methanobacterium ruminantium*.  
813 *Appl. Environ. Microbiol.* **34**, 297–301 (1977).
- 814 34. Vogels, G. D., Hoppe, W. F. & Stumm, C. K. Association of methanogenic  
815 bacteria with rumen ciliates. *Appl. Environ. Microbiol.* **40**, 608–612 (1980).
- 816 35. Finlay, B. J. *et al.* Some rumen ciliates have endosymbiotic methanogens.  
817 *FEMS Microbiol. Lett.* **117**, 157–161 (1994).
- 818 36. Ng, F. *et al.* An adhesin from hydrogen-utilizing rumen methanogen  
819 *Methanobrevibacter ruminantium* M 1 binds a broad range of hydrogen-  
820 producing microorganisms. *Environ. Microbiol.* **18**, 3010–3021 (2016).
- 821 37. Stams, A. J. M. & Plugge, C. M. Electron transfer in syntrophic communities of  
822 anaerobic bacteria and archaea. *Nat. Rev. Microbiol.* **7**, 568 (2009).
- 823 38. Schuchmann, K. & Muller, V. Autotrophy at the thermodynamic limit of life: a  
824 model for energy conservation in acetogenic bacteria. *Nat. Rev. Microbiol.* **12**,  
825 809–821 (2014).
- 826 39. Genthner, B. R., Davis, C. L. & Bryant, M. P. Features of rumen and sewage  
827 sludge strains of *Eubacterium limosum*, a methanol- and H<sub>2</sub>-CO<sub>2</sub>-utilizing

- 828 species. *Appl. Environ. Microbiol.* **42**, 12–19 (1981).
- 829 40. Rieu-Lesme, F., Morvan, B., Collins, M. D., Fonty, G. & Willems, A. A new  
830 H<sub>2</sub>/CO<sub>2</sub>-using acetogenic bacterium from the rumen: description of  
831 *Ruminococcus schinkii* sp. nov. *FEMS Microbiol. Lett.* **140**, 281–286 (1996).
- 832 41. Greening, R. C. & Leedale, J. A. Z. Enrichment and isolation of *Acetitomaculum*  
833 *ruminis*, gen. nov., sp. nov.: acetogenic bacteria from the bovine rumen. *Arch.*  
834 *Microbiol.* **151**, 399–406 (1989).
- 835 42. Morvan, B. *et al.* Establishment of hydrogen-utilizing bacteria in the rumen of  
836 the newborn lamb. *FEMS Microbiol. Lett.* **117**, 249–256 (1994).
- 837 43. Morvan, B., Bonnemoy, F., Fonty, G. & Gouet, P. Quantitative determination of  
838 H<sub>2</sub>-utilizing acetogenic and sulfate-reducing bacteria and methanogenic  
839 archaea from digestive tract of different mammals. *Curr. Microbiol.* **32**, 129–  
840 133 (1996).
- 841 44. Henderson, G., Naylor, G. E., Leahy, S. C. & Janssen, P. H. Presence of  
842 novel, potentially homoacetogenic bacteria in the rumen as determined by  
843 analysis of formyltetrahydrofolate synthetase sequences from ruminants. *Appl.*  
844 *Environ. Microbiol.* **76**, 2058–2066 (2010).
- 845 45. Janssen, P. H. Influence of hydrogen on rumen methane formation and  
846 fermentation balances through microbial growth kinetics and fermentation  
847 thermodynamics. *Anim. Feed Sci. Technol.* **160**, 1–22 (2010).
- 848 46. Conrad, R., Goodwin, S. & Zeikus, J. G. Hydrogen metabolism in a mildly  
849 acidic lake sediment (Knaack Lake). *FEMS Microbiol. Lett.* **45**, 243–249  
850 (1987).
- 851 47. Joblin, K. N. Ruminal acetogens and their potential to lower ruminant methane  
852 emissions. *Aust. J. Agric. Res.* **50**, 1307–1314 (1999).
- 853 48. Attwood, G. & McSweeney, C. Methanogen genomics to discover targets for  
854 methane mitigation technologies and options for alternative H<sub>2</sub> utilisation in the  
855 rumen. *Aust. J. Exp. Agric.* **48**, 28–37 (2008).
- 856 49. Huisingh, J., McNeill, J. J. & Matrone, G. Sulfate reduction by a *Desulfovibrio*  
857 species isolated from sheep rumen. *Appl. Microbiol.* **28**, 489–497 (1974).
- 858 50. Howard, B. H. & Hungate, R. E. *Desulfovibrio* of the sheep rumen. *Appl.*  
859 *Environ. Microbiol.* **32**, 598–602 (1976).
- 860 51. Henderson, C. The influence of extracellular hydrogen on the metabolism of  
861 *Bacteroides ruminicola*, *Anaerovibrio lipolytica* and *Selenomonas ruminantium*.

- 862 *Microbiology* **119**, 485–491 (1980).
- 863 52. Martin, S. A. & Park, C.-M. Effect of extracellular hydrogen on organic acid  
864 utilization by the ruminal bacterium *Selenomonas ruminantium*. *Curr. Microbiol.*  
865 **32**, 327–331 (1996).
- 866 53. Wolin, M. J., Wolin, E. A. & Jacobs, N. J. Cytochrome-producing anaerobic  
867 vibrio, *Vibrio succinogenes*, sp. n. *J. Bacteriol.* **81**, 911 (1961).
- 868 54. Tanner, A. C. R. *et al.* *Wolinella* gen. nov., *Wolinella succinogenes* (*Vibrio*  
869 *succinogenes* Wolin et al.) comb. nov., and description of *Bacteroides gracilis*  
870 sp. nov., *Wolinella recta* sp. nov., *Campylobacter concisus* sp. nov. *Int. J.*  
871 *Syst. Evol. Microbiol.* **31**, 432–445 (1981).
- 872 55. Unden, G., Hackenberg, H. & Kröger, A. Isolation and functional aspects of the  
873 fumarate reductase involved in the phosphorylative electron transport of *Vibrio*  
874 *succinogenes*. *Biochim. Biophys. Acta (BBA)-Bioenergetics* **591**, 275–288  
875 (1980).
- 876 56. Jones, G. A. Dissimilatory metabolism of nitrate by the rumen microbiota. *Can.*  
877 *J. Microbiol.* **18**, 1783–1787 (1972).
- 878 57. Iwamoto, M., Asanuma, N. & Hino, T. Ability of *Selenomonas ruminantium*,  
879 *Veillonella parvula*, and *Wolinella succinogenes* to reduce nitrate and nitrite  
880 with special reference to the suppression of ruminal methanogenesis.  
881 *Anaerobe* **8**, 209–215 (2002).
- 882 58. Bokranz, M., Katz, J., Schröder, I., Roberton, A. M. & Kröger, A. Energy  
883 metabolism and biosynthesis of *Vibrio succinogenes* growing with nitrate or  
884 nitrite as terminal electron acceptor. *Arch. Microbiol.* **135**, 36–41 (1983).
- 885 59. Anderson, R. C., Rasmussen, M. A., Jensen, N. S. & Allison, M. J.  
886 *Denitrobacterium detoxificans* gen. nov., sp. nov., a ruminal bacterium that  
887 respire on nitrocompounds. *Int. J. Syst. Evol. Microbiol.* **50**, 633–638 (2000).
- 888 60. Schwartz, E., Fritsch, J. & Friedrich, B. *H<sub>2</sub>-metabolizing prokaryotes*. (Springer  
889 Berlin Heidelberg, 2013).
- 890 61. Van Zijderveld, S. M. *et al.* Nitrate and sulfate: Effective alternative hydrogen  
891 sinks for mitigation of ruminal methane production in sheep. *J. Dairy Sci.* **93**,  
892 5856–5866 (2010).
- 893 62. Bayaru, E. *et al.* Effect of fumaric acid on methane production, rumen  
894 fermentation and digestibility of cattle fed roughage alone. *Nihon Chikusan*  
895 *Gakkaiho* **72**, 139–146 (2001).

- 896 63. Shi, W. *et al.* Methane yield phenotypes linked to differential gene expression  
897 in the sheep rumen microbiome. *Genome Res.* **24**, 1517–1525 (2014).
- 898 64. Kamke, J. *et al.* Rumen metagenome and metatranscriptome analyses of low  
899 methane yield sheep reveals a *Sharpea*-enriched microbiome characterised by  
900 lactic acid formation and utilisation. *Microbiome* **4**, 56 (2016).
- 901 65. Greening, C. *et al.* Genomic and metagenomic surveys of hydrogenase  
902 diversity indicate H<sub>2</sub> is a widely-utilised energy source for microbial growth and  
903 survival. *ISME J.* **10**, 761–777 (2016).
- 904 66. Søndergaard, D., Pedersen, C. N. S. & Greening, C. HydDB: a web tool for  
905 hydrogenase classification and analysis. *Sci. Rep.* **6**, 34212 (2016).
- 906 67. Bryant, M. P., Small, N., Bouma, C. & Robinson, I. M. Characteristics of  
907 ruminal anaerobic cellulolytic cocci and *Cillobacterium cellulosolvens* n. sp. *J.*  
908 *Bacteriol.* **76**, 529 (1958).
- 909 68. Kittelmann, S. *et al.* Two different bacterial community types are linked with the  
910 low-methane emission trait in sheep. *PLoS One* **9**, e103171 (2014).
- 911 69. Carere, C. R. *et al.* Mixotrophy drives niche expansion of verrucomicrobial  
912 methanotrophs. *ISME J* **11**, 2599–2610 (2017).
- 913 70. Ji, M. *et al.* Atmospheric trace gases support primary production in Antarctic  
914 desert surface soil. *Nature* **552**, 400–403 (2017).
- 915 71. Dong, X. *et al.* Fermentative Spirochaetes mediate necromass recycling in  
916 anoxic hydrocarbon-contaminated habitats. *ISME J.* (2018).  
917 doi:10.1038/s41396-018-0148-3
- 918 72. Dykstra, S., Pjevac, P., Ovanesov, K. & Mussmann, M. Evidence for H<sub>2</sub>  
919 consumption by uncultured Desulfobacterales in coastal sediments. *Environ.*  
920 *Microbiol.* **20**, 450–461 (2018).
- 921 73. Peters, J. W., Lanzilotta, W. N., Lemon, B. J. & Seefeldt, L. C. X-ray crystal  
922 structure of the Fe-only hydrogenase (Cpl) from *Clostridium pasteurianum* to  
923 1.8 Angstrom resolution. *Science* **282**, 1853–1858 (1998).
- 924 74. Betian, H. G., Linehan, B. A., Bryant, M. P. & Holdeman, L. V. Isolation of a  
925 cellulolytic *Bacteroides* sp. from human feces. *Appl. Environ. Microbiol.* **33**,  
926 1009–1010 (1977).
- 927 75. Biswas, R., Zheng, T., Olson, D. G., Lynd, L. R. & Guss, A. M. Elimination of  
928 hydrogenase active site assembly blocks H<sub>2</sub> production and increases ethanol  
929 yield in *Clostridium thermocellum*. *Biotechnol. Biofuels* **8**, 20 (2015).



- 930 76. Schut, G. J. & Adams, M. W. W. The iron-hydrogenase of *Thermotoga*  
931 *maritima* utilizes ferredoxin and NADH synergistically: a new perspective on  
932 anaerobic hydrogen production. *J. Bacteriol.* **191**, 4451–4457 (2009).
- 933 77. Schuchmann, K. & Müller, V. A bacterial electron-bifurcating hydrogenase. *J.*  
934 *Biol. Chem.* **287**, 31165–31171 (2012).
- 935 78. Vignais, P. M. & Billoud, B. Occurrence, classification, and biological function  
936 of hydrogenases: an overview. *Chem. Rev.* **107**, 4206–4272 (2007).
- 937 79. Chen, S., Niu, L. & Zhang, Y. *Saccharofermentans acetigenes* gen. nov., sp.  
938 nov., an anaerobic bacterium isolated from sludge treating brewery  
939 wastewater. *Int. J. Syst. Evol. Microbiol.* **60**, 2735–2738 (2010).
- 940 80. Allegretti, M., Mills, D. J., McMullan, G., Kühlbrandt, W. & Vonck, J. Atomic  
941 model of the F<sub>420</sub>-reducing [NiFe] hydrogenase by electron cryo-microscopy  
942 using a direct electron detector. *Elife* **3**, e01963 (2014).
- 943 81. Wagner, T., Koch, J., Ermler, U. & Shima, S. Methanogenic heterodisulfide  
944 reductase (HdrABC-MvhAGD) uses two noncubane [4Fe-4S] clusters for  
945 reduction. *Science (80- )*. **357**, 699–703 (2017).
- 946 82. Lie, T. J. *et al.* Essential anaplerotic role for the energy-converting  
947 hydrogenase Eha in hydrogenotrophic methanogenesis. *Proc. Natl. Acad. Sci.*  
948 *U. S. A.* **109**, 15473–8 (2012).
- 949 83. Major, T. A., Liu, Y. & Whitman, W. B. Characterization of energy-conserving  
950 hydrogenase B in *Methanococcus maripaludis*. *J. Bacteriol.* **192**, 4022–4030  
951 (2010).
- 952 84. Shima, S. *et al.* The crystal structure of [Fe]-Hydrogenase reveals the  
953 geometry of the active site. *Science* **321**, 572–575 (2008).
- 954 85. Marais, J. P., Therion, J. J., Mackie, R. I., Kistner, A. & Dennison, C. Effect of  
955 nitrate and its reduction products on the growth and activity of the rumen  
956 microbial population. *Br. J. Nutr.* **59**, 301–313 (1988).
- 957 86. Poudel, S. *et al.* Unification of [FeFe]-hydrogenases into three structural and  
958 functional groups. *Biochim. Biophys. Acta (BBA)-General Subj.* **1860**,  
959 doi:10.1016/j.bbagen.2016.05.034 (2016).
- 960 87. Chongdar, N. *et al.* Unique spectroscopic properties of the H-Cluster in a  
961 putative sensory [FeFe] hydrogenase. *J. Am. Chem. Soc.* **140**, 1057–1068  
962 (2018).
- 963 88. Greening, C. & Cook, G. M. G. M. Integration of hydrogenase expression and



- 964 hydrogen sensing in bacterial cell physiology. *Curr. Opin. Microbiol.* **18**, 30–8  
965 (2014).
- 966 89. Lenz, O. & Friedrich, B. A novel multicomponent regulatory system mediates  
967 H<sub>2</sub> sensing in *Alcaligenes eutrophus*. *Proc. Natl. Acad. Sci. U. S. A.* **95**,  
968 12474–12479 (1998).
- 969 90. Pinares-Patiño, C. S. *et al.* Heritability estimates of methane emissions from  
970 sheep. *Animal* **7**, 316–321 (2013).
- 971 91. Asanuma, N., Iwamoto, M. & Hino, T. Effect of the addition of fumarate on  
972 methane production by ruminal microorganisms in vitro. *J. Dairy Sci.* **82**, 780–  
973 787 (1999).
- 974 92. Patra, A. K. & Yu, Z. Combinations of nitrate, saponin, and sulfate additively  
975 reduce methane production by rumen cultures in vitro while not adversely  
976 affecting feed digestion, fermentation or microbial communities. *Bioresour.*  
977 *Technol.* **155**, 129–135 (2014).
- 978 93. Božic, A. K. *et al.* Effects of the methane-inhibitors nitrate, nitroethane, lauric  
979 acid, Lauricidin® and the Hawaiian marine algae *Chaetoceros* on ruminal  
980 fermentation in vitro. *Bioresour. Technol.* **100**, 4017–4025 (2009).
- 981 94. Van Zijderveld, S. M. *et al.* Persistency of methane mitigation by dietary nitrate  
982 supplementation in dairy cows. *J. Dairy Sci.* **94**, 4028–4038 (2011).
- 983 95. Hulshof, R. B. A. *et al.* Dietary nitrate supplementation reduces methane  
984 emission in beef cattle fed sugarcane-based diets. *J. Anim. Sci.* **90**, 2317–  
985 2323 (2012).
- 986 96. Greening, C. *et al.* Genomic and metagenomic surveys of hydrogenase  
987 distribution indicate H<sub>2</sub> is a widely utilised energy source for microbial growth  
988 and survival. *ISME J.* **10**, (2016).
- 989 97. Evans, P. N. *et al.* Methane metabolism in the archaeal phylum  
990 *Bathyarchaeota* revealed by genome-centric metagenomics. *Science* **350**,  
991 434–438 (2015).
- 992 98. Adam, P. S., Borrel, G. & Gribaldo, S. Evolutionary history of carbon monoxide  
993 dehydrogenase/acetyl-CoA synthase, one of the oldest enzymatic complexes.  
994 *Proc. Natl. Acad. Sci.* 201716667 (2018).
- 995 99. Anantharaman, K. *et al.* Expanded diversity of microbial groups that shape the  
996 dissimilatory sulfur cycle. *ISME J.* **1** (2018).
- 997 100. Lemos, R. S., Fernandes, A. S., Pereira, M. M., Gomes, C. M. & Teixeira, M.

- 998 Quinol: fumarate oxidoreductases and succinate: quinone oxidoreductases:  
999 phylogenetic relationships, metal centres and membrane attachment. *Biochim.*  
1000 *Biophys. Acta (BBA)-Bioenergetics* **1553**, 158–170 (2002).
- 1001 101. Boyd, E. & Peters, J. W. New insights into the evolutionary history of biological  
1002 nitrogen fixation. *Front. Microbiol.* **4**, 201 (2013).
- 1003 102. Cock, P. J. A. *et al.* Biopython: freely available Python tools for computational  
1004 molecular biology and bioinformatics. *Bioinformatics* **25**, 1422–1423 (2009).
- 1005 103. Altschul, S. F., Gish, W., Miller, W., Myers, E. W. & Lipman, D. J. Basic local  
1006 alignment search tool. *J. Mol. Biol.* **215**, 403–410 (1990).
- 1007 104. Buchfink, B., Xie, C. & Huson, D. H. Fast and sensitive protein alignment using  
1008 DIAMOND. *Nat. Methods* **12**, 59 (2014).
- 1009 105. Balch, W. E., Fox, G. E., Magrum, L. J., Woese, C. R. & Wolfe, R. S.  
1010 Methanogens: reevaluation of a unique biological group. *Microbiol. Rev.* **43**,  
1011 260 (1979).
- 1012 106. Suen, G. *et al.* Complete genome of the cellulolytic ruminal bacterium  
1013 *Ruminococcus albus* 7. *J. Bacteriol.* **193**, 5574–5575 (2011).
- 1014 107. Baar, C. *et al.* Complete genome sequence and analysis of *Wolinella*  
1015 *succinogenes*. *Proc. Natl. Acad. Sci.* **100**, 11690–11695 (2003).
- 1016 108. Baggerly, K. A., Deng, L., Morris, J. S. & Aldaz, C. M. Differential expression in  
1017 SAGE: accounting for normal between-library variation. *Bioinformatics* **19**,  
1018 1477–1483 (2003).
- 1019 109. Storey, J. D. & Tibshirani, R. Statistical significance for genomewide studies.  
1020 *Proc. Natl. Acad. Sci.* **100**, 9440–9445 (2003).
- 1021 110. Aziz, R. K. *et al.* The RAST Server: rapid annotations using subsystems  
1022 technology. *BMC Genomics* **9**, 75 (2008).
- 1023

# Bacteria

Bacteroidales  
Bifidobacteriales  
Campylobacteriales  
Clostridiales  
Coriobacteriales  
Corynebacteriales  
Desulfovibrionales  
Enterobacteriales  
Erysipelotrichales  
Lactobacillales  
Pasteurellales  
Selenomonadales  
Spirochaetales  
Synergistales

# Archaea

Methanobacteriales  
Methanomassiliicoccales  
Methanosarcinales

# Eukarya

Entodiniomorphida  
Neocallimastigales  
Vestibuliferida

Number of genomes

Fermentative hydrogenase  
Bifurcating hydrogenase  
Respiratory hydrogenase  
Methanogenic hydrogenase  
Energy-converting hydrogenase  
Sensory hydrogenase  
Hydrogenase-associated diaphorase  
Nitrogenase

Methyl-CoM reductase  
Acetyl-CoA synthase  
Adenylylsulfate reductase  
Dissimilatory sulfite reductase  
Alternative sulfite reductase  
Fumarate reductase  
Dissimilatory nitrate reductase  
Periplasmic nitrate reductase  
Ammonia-forming nitrite reductase  
DMSO / TMAO reductase  
Cytochrome *bd* oxidase

bioRxiv preprint doi: <https://doi.org/10.1101/446394>; this version posted December 4, 2018. The copyright holder for this preprint (which was not certified by peer review) is the author/funder, who has granted bioRxiv a license to display the preprint in perpetuity. It is made available under aCC-BY-NC-ND 4.0 International license.

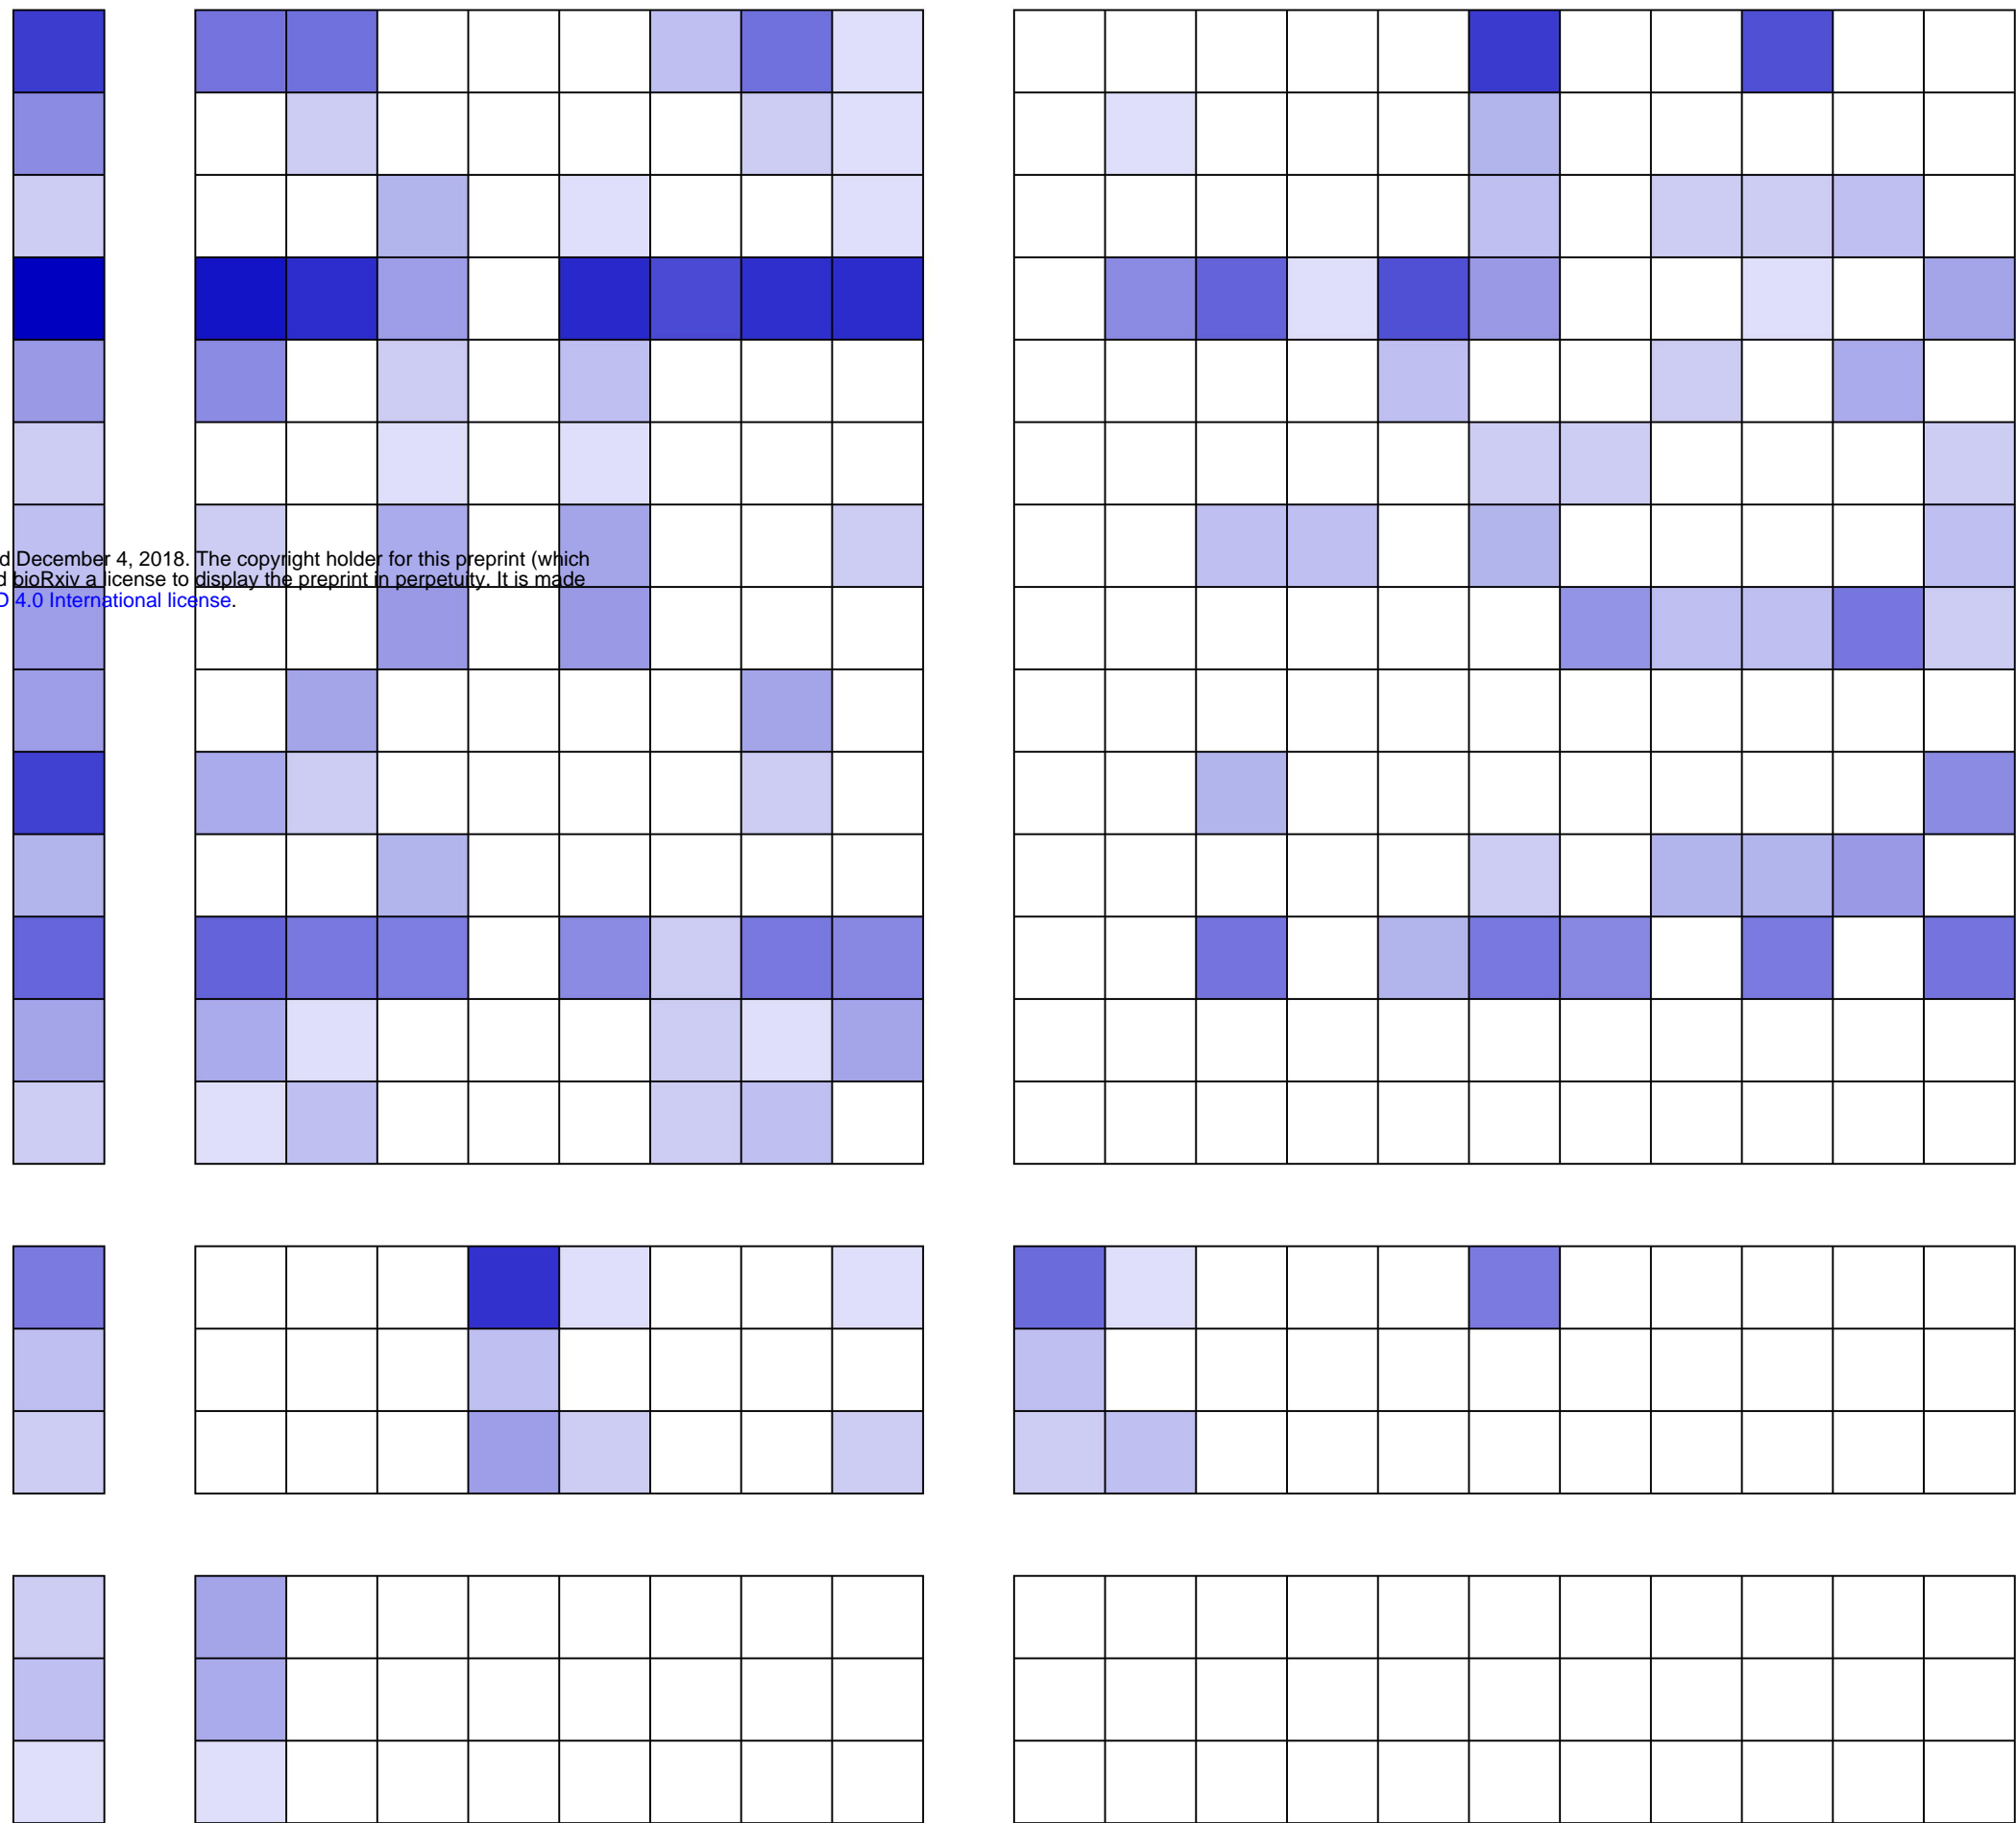

Log<sub>2</sub> (Gene Count + 1)

7

6

5

4

3

2

1

0



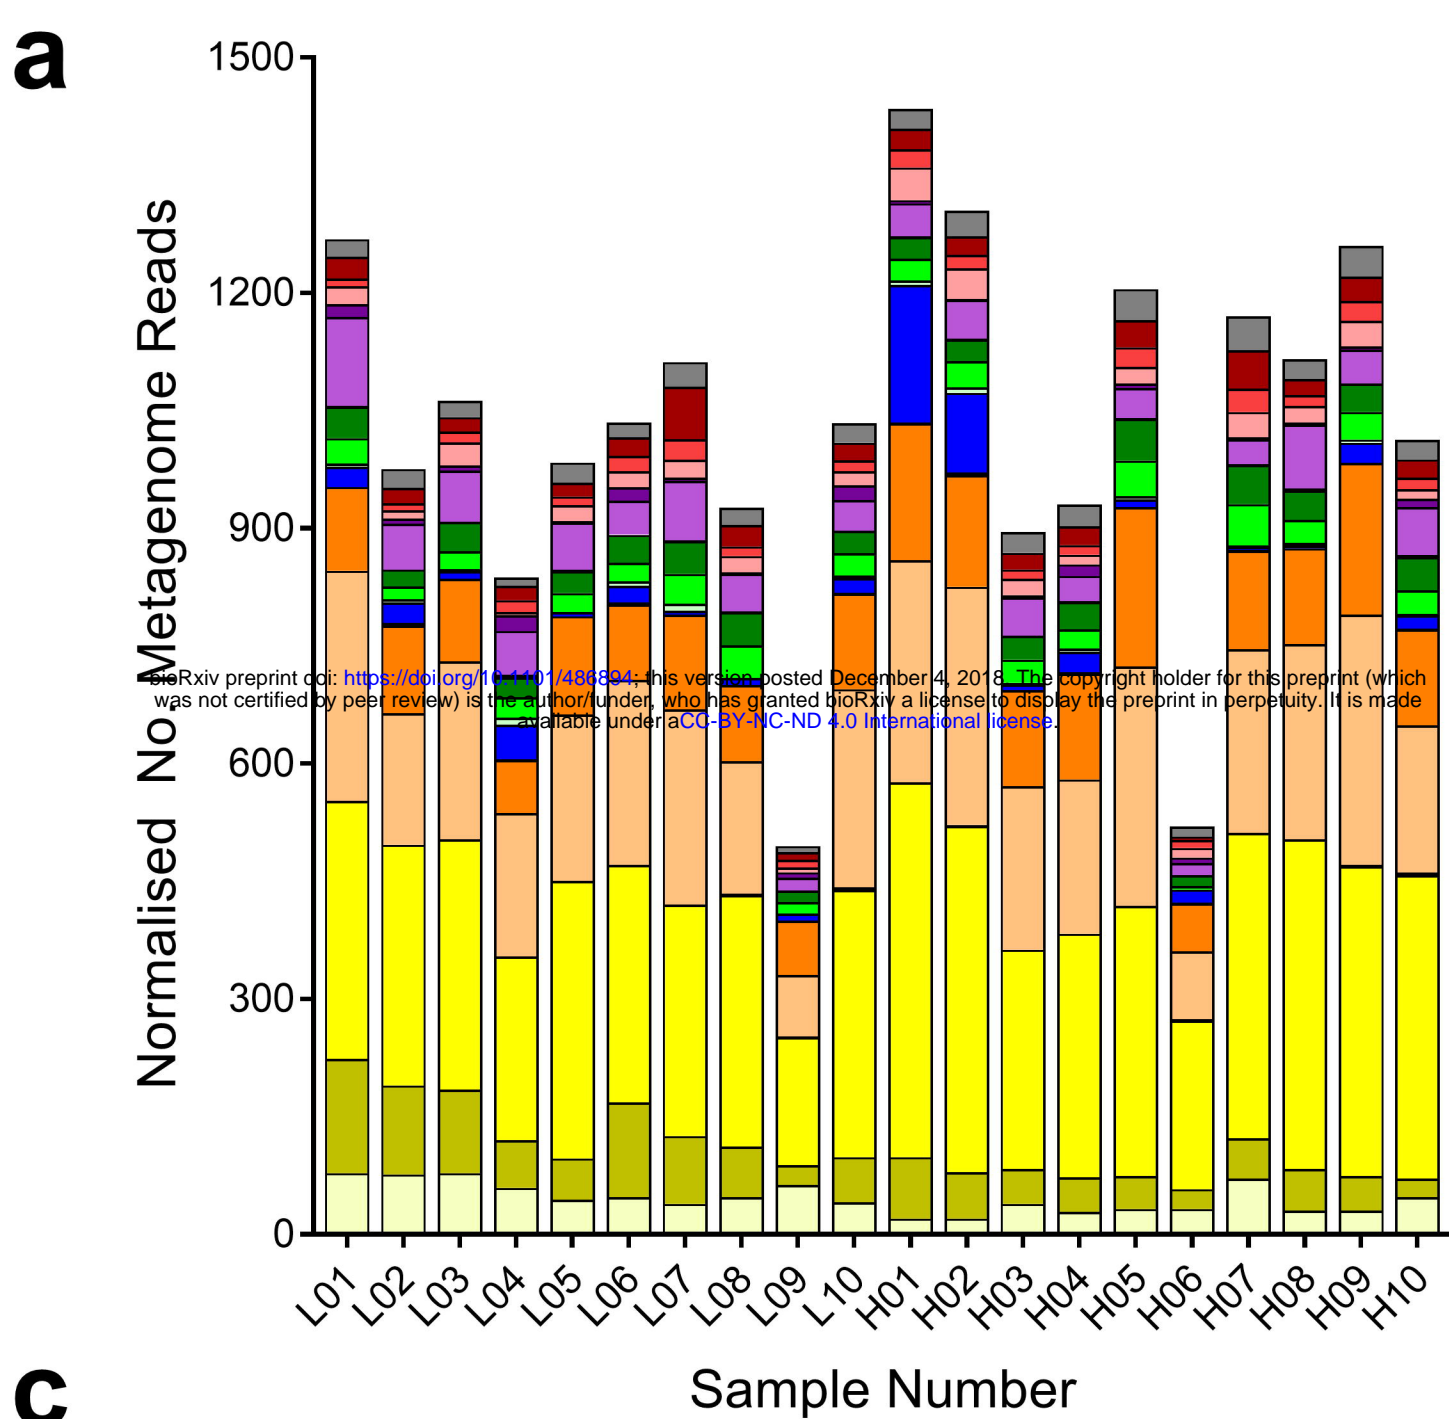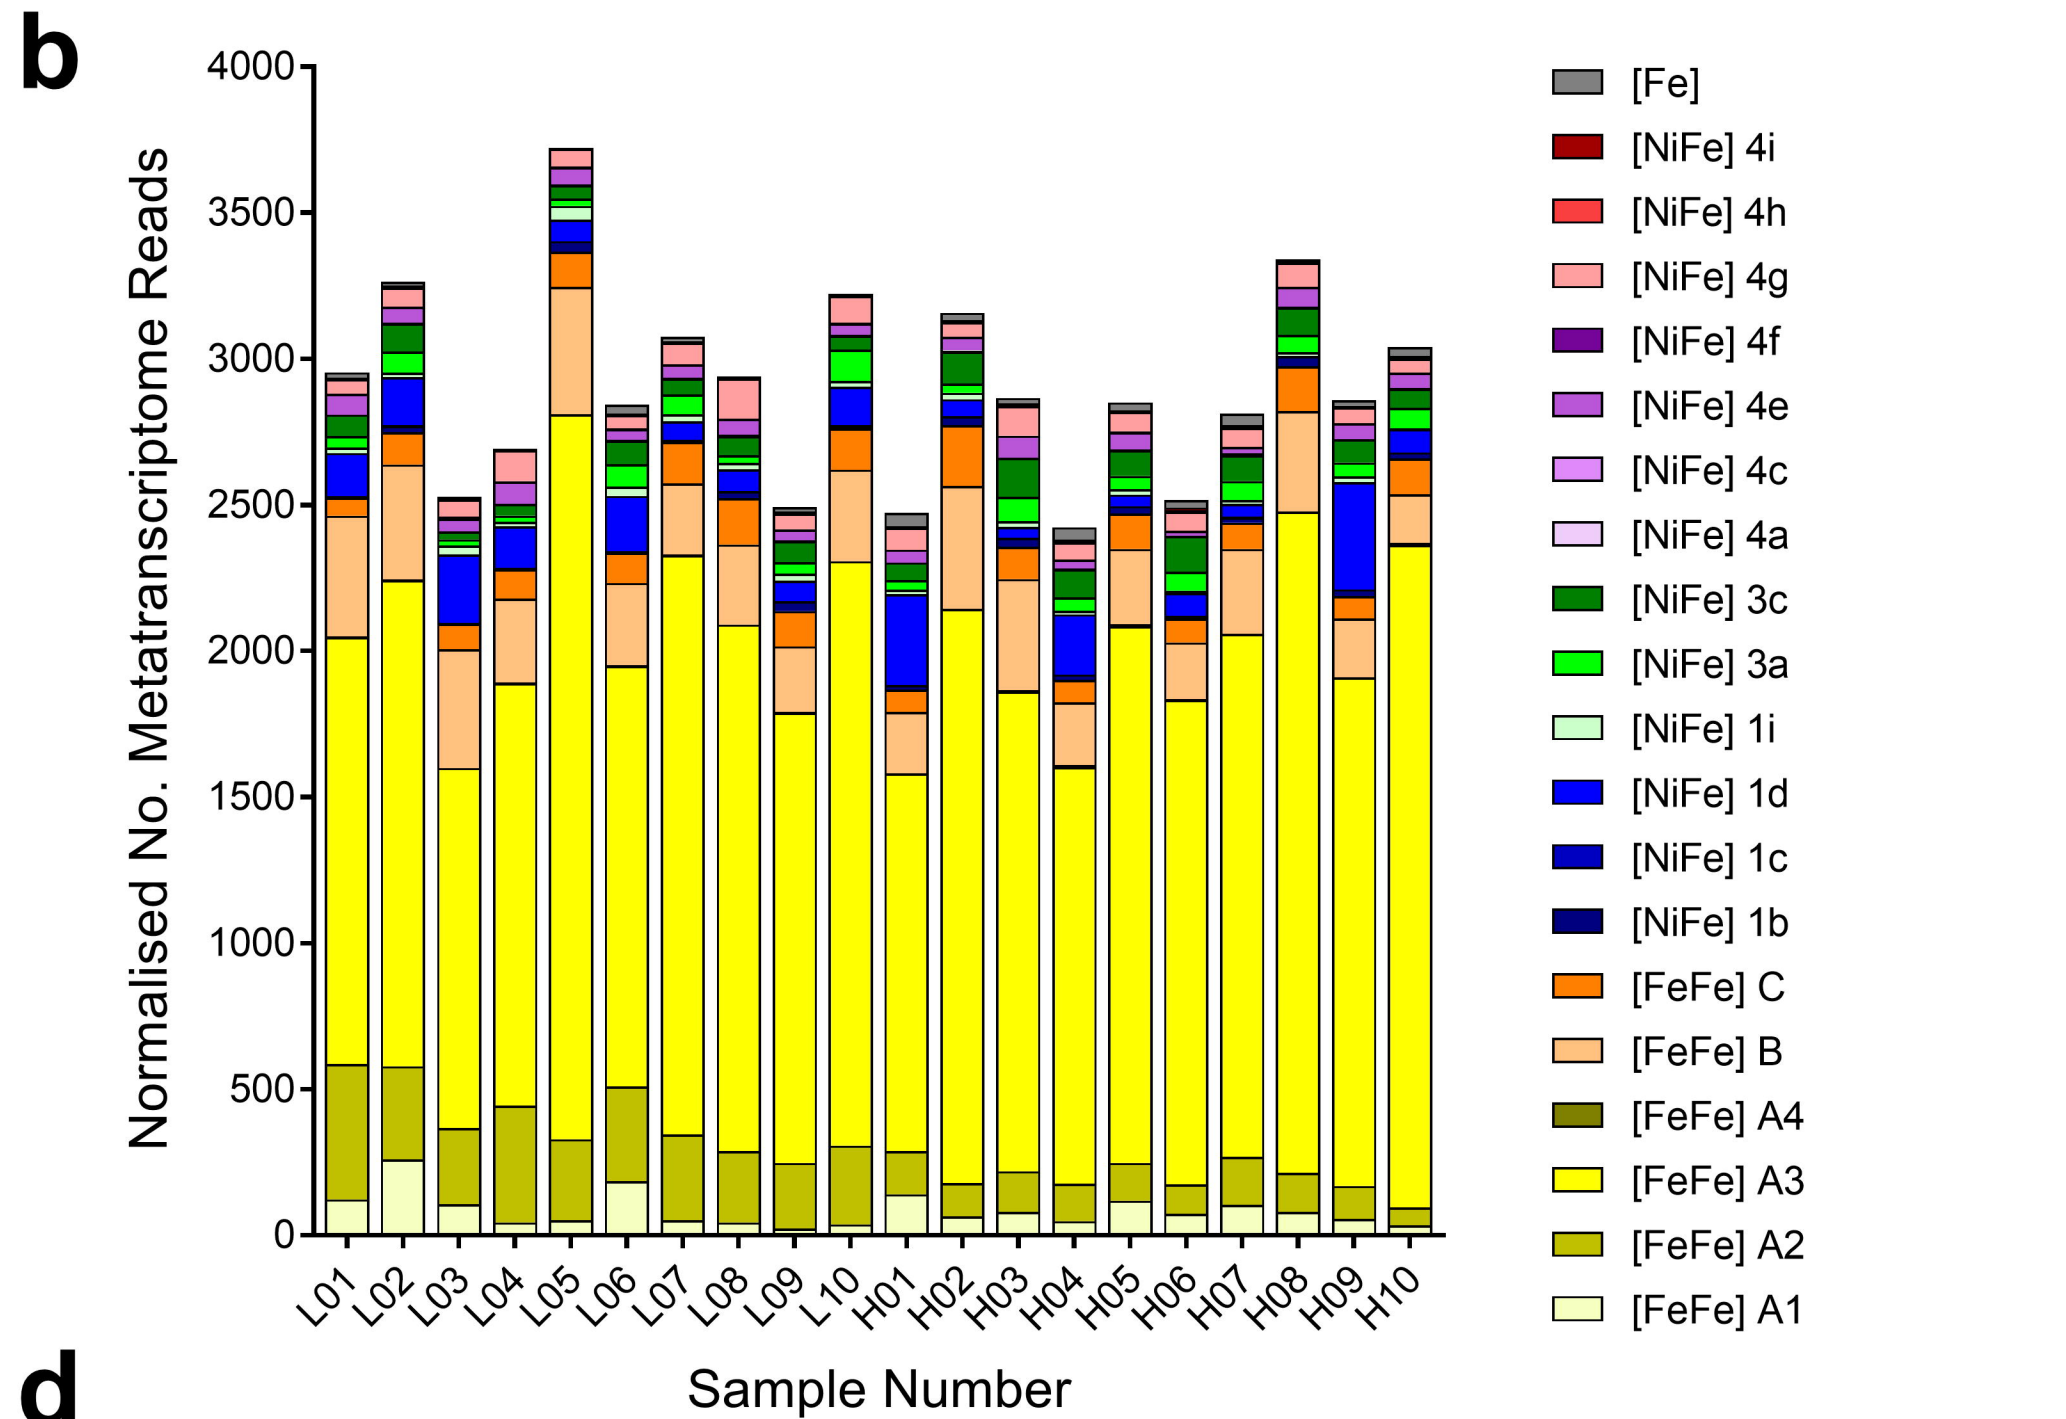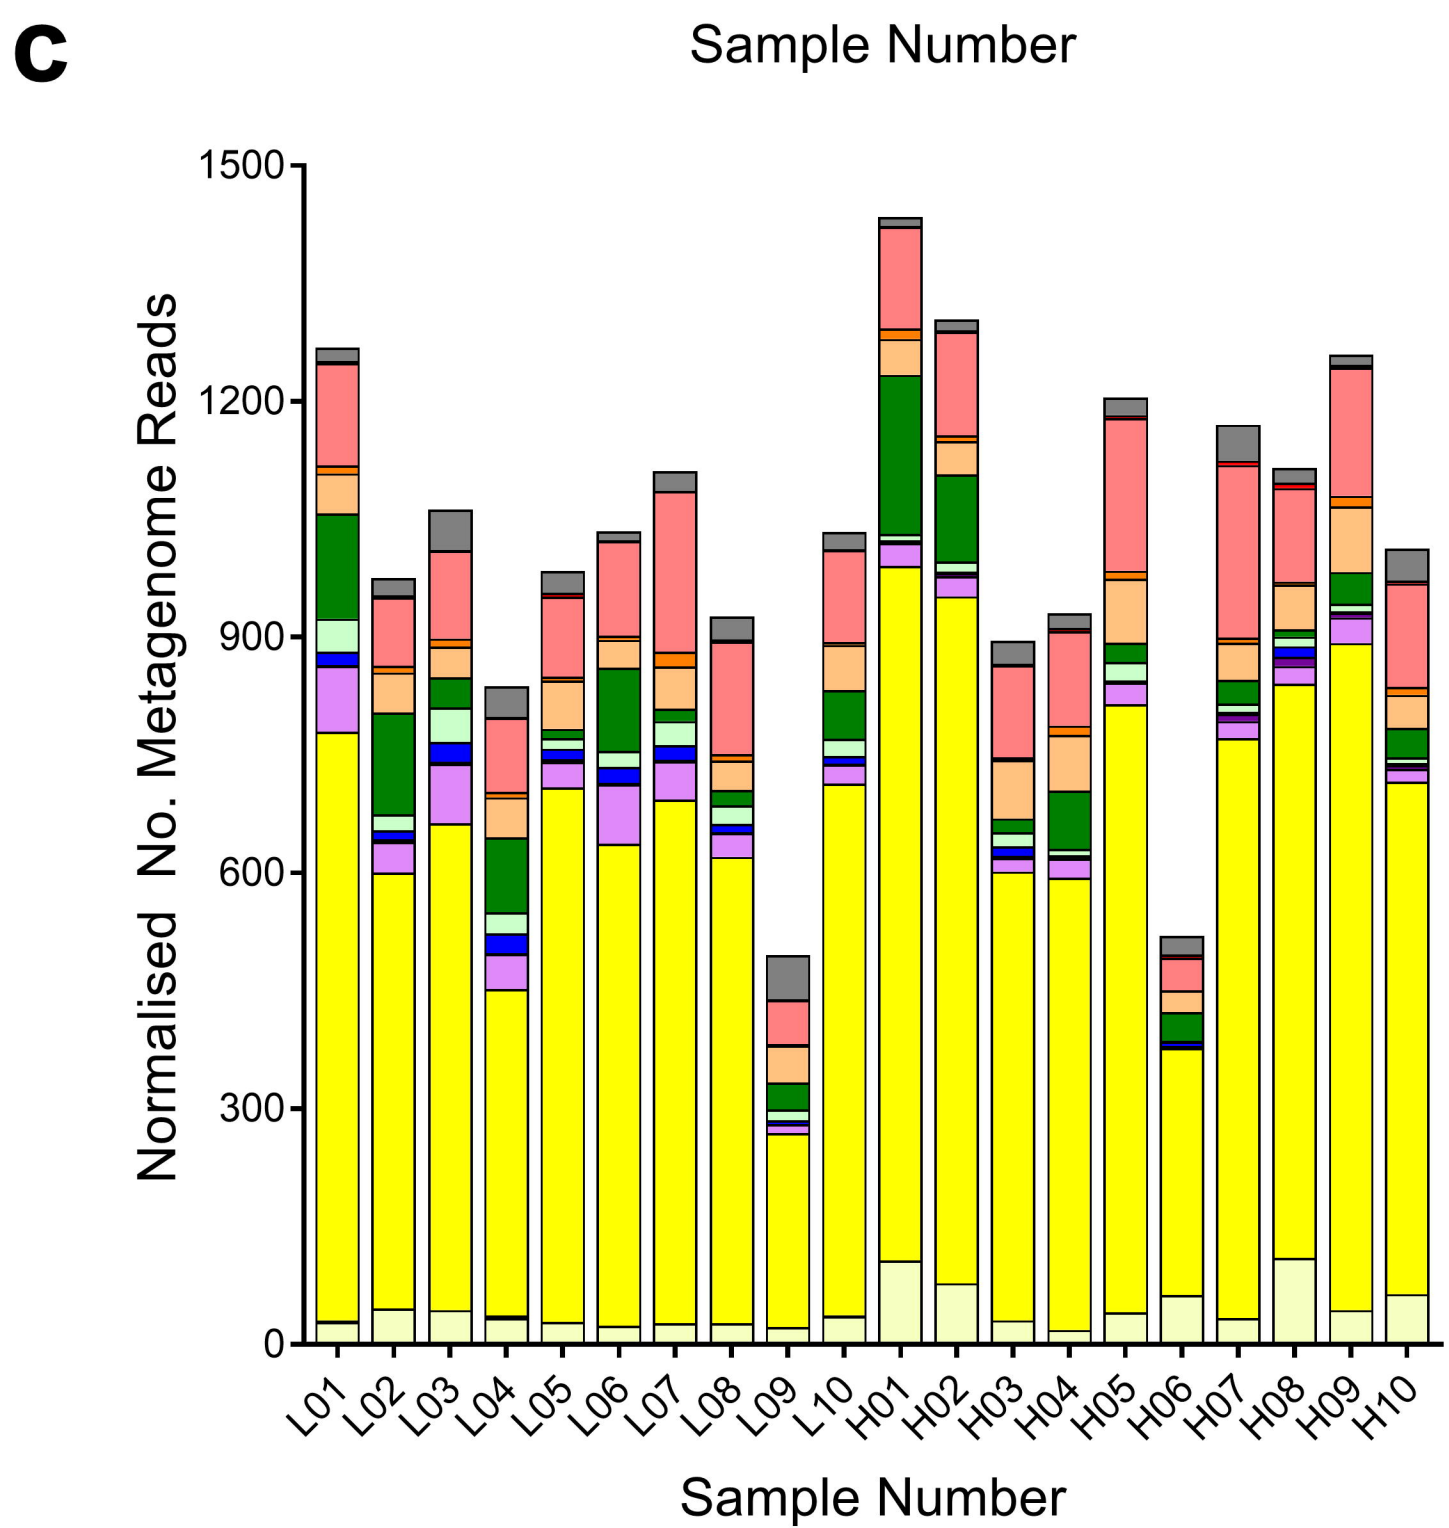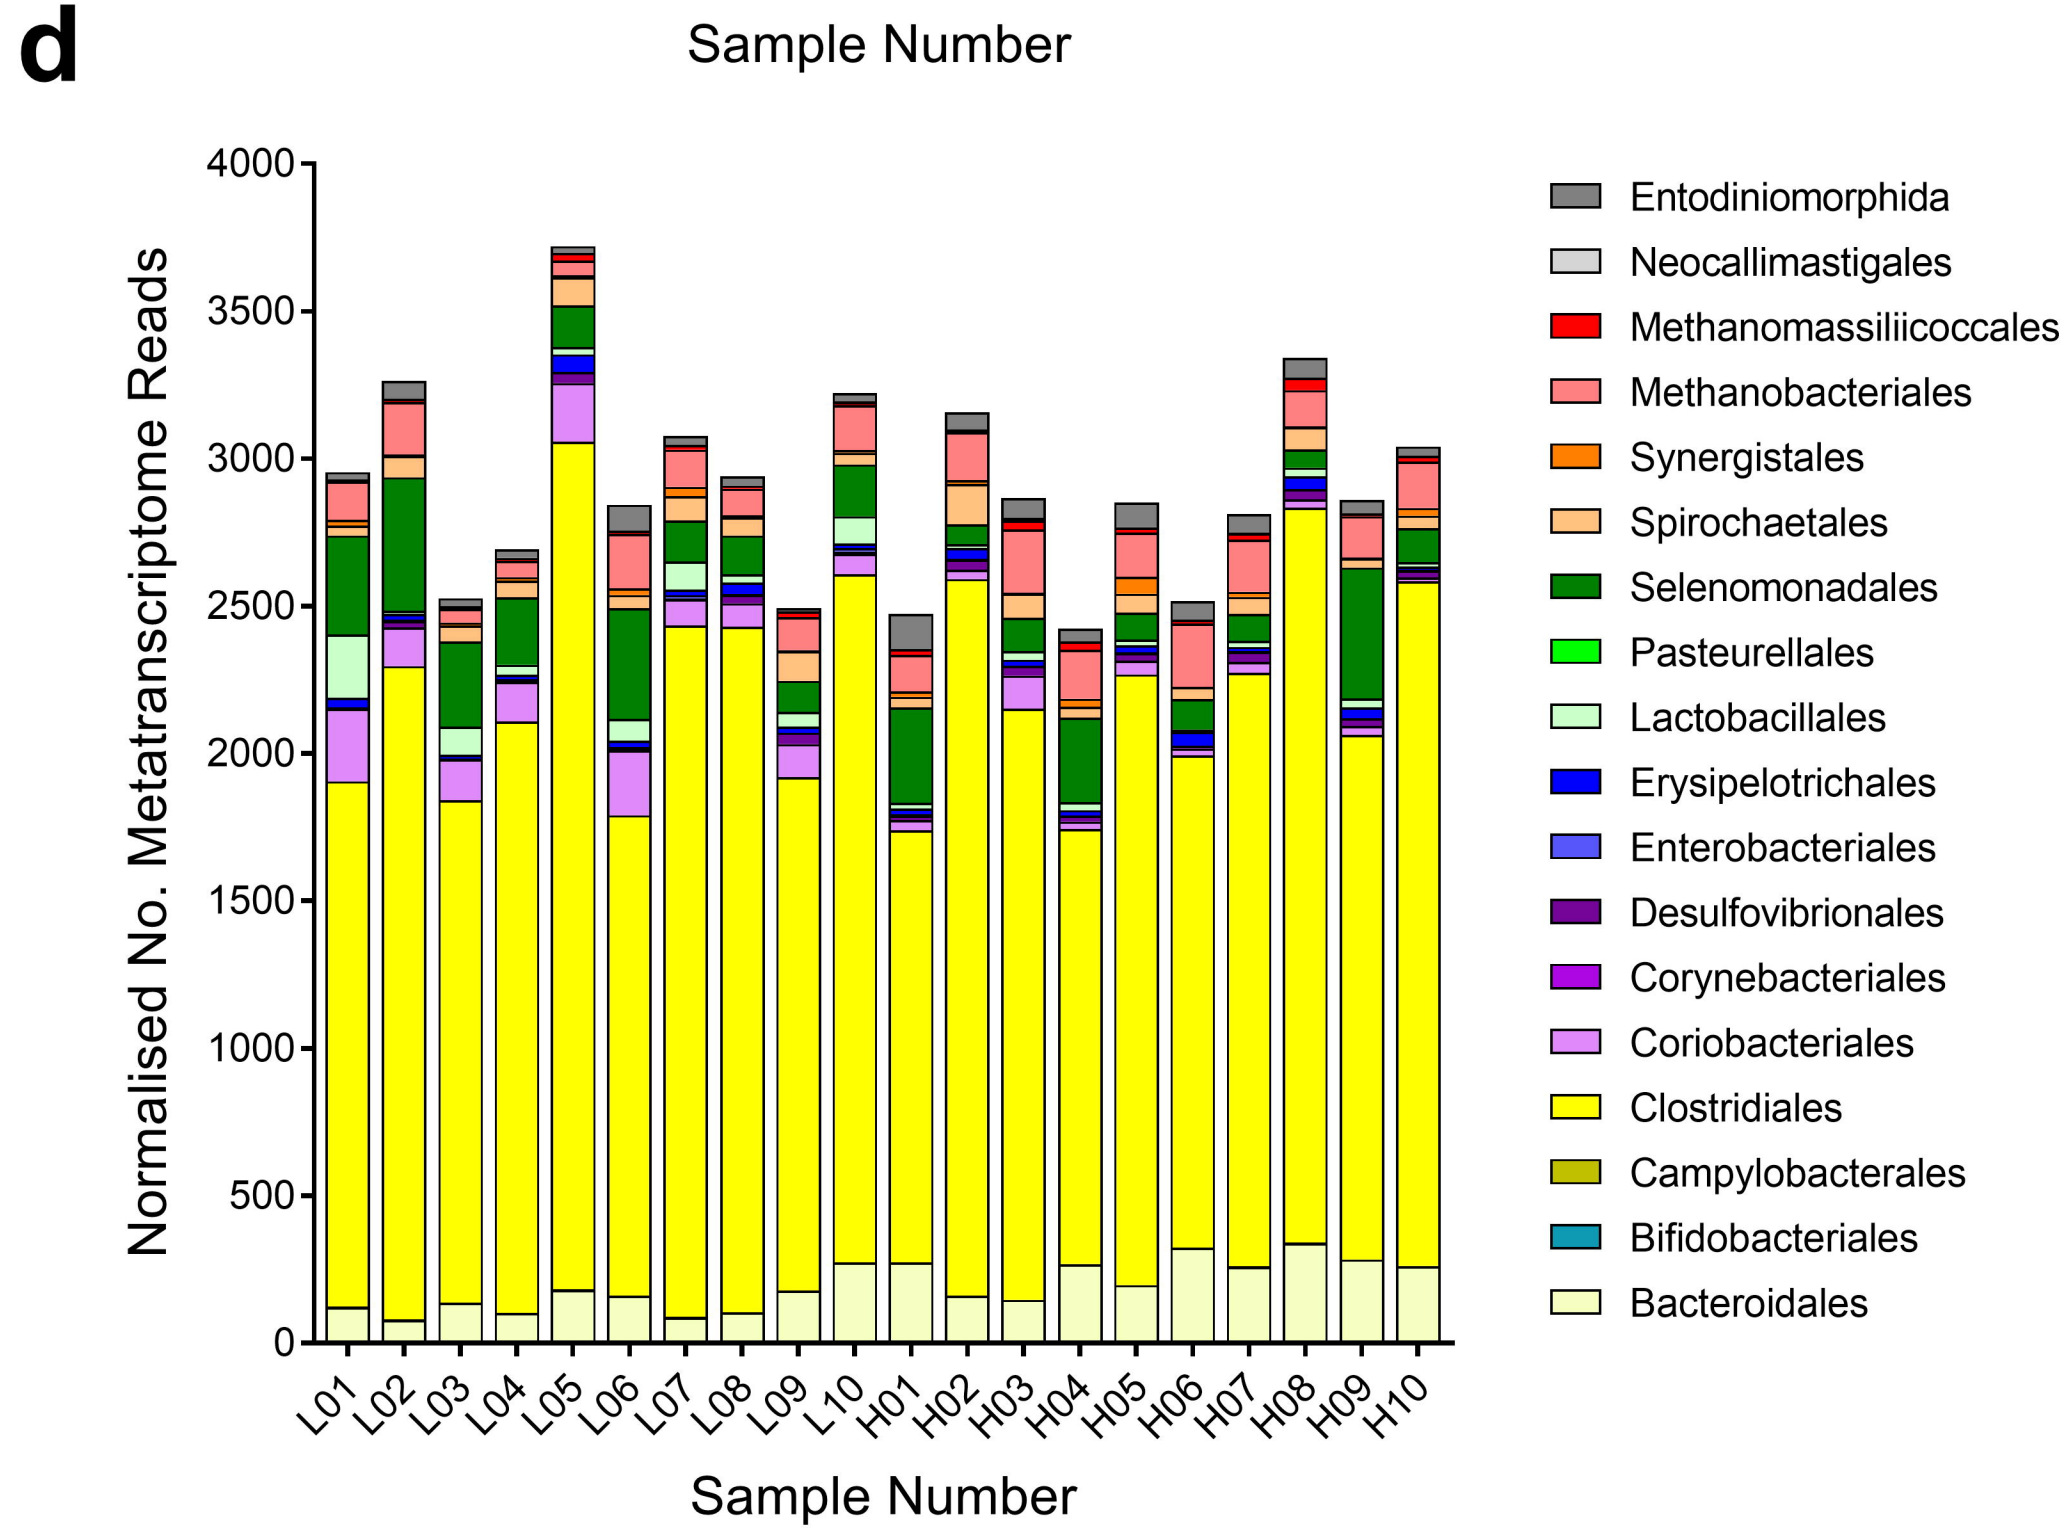

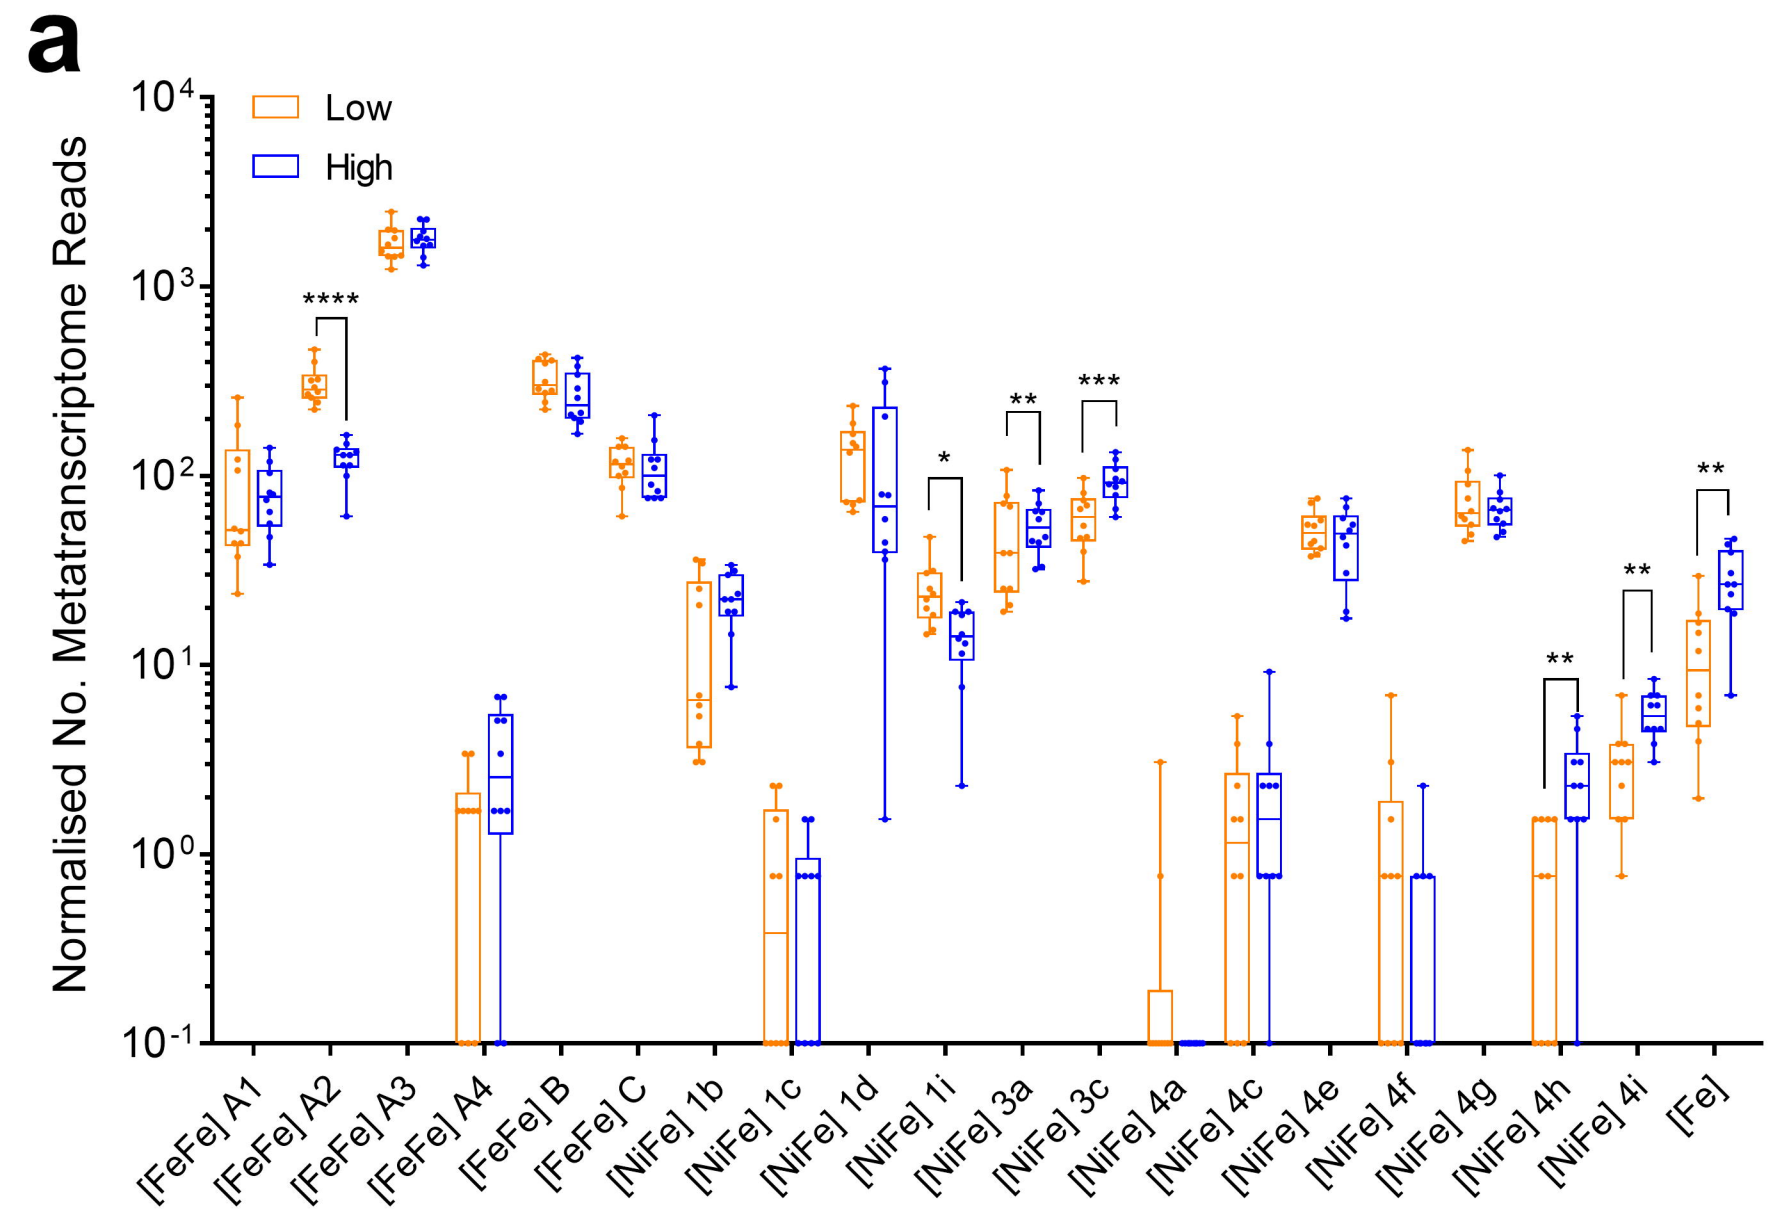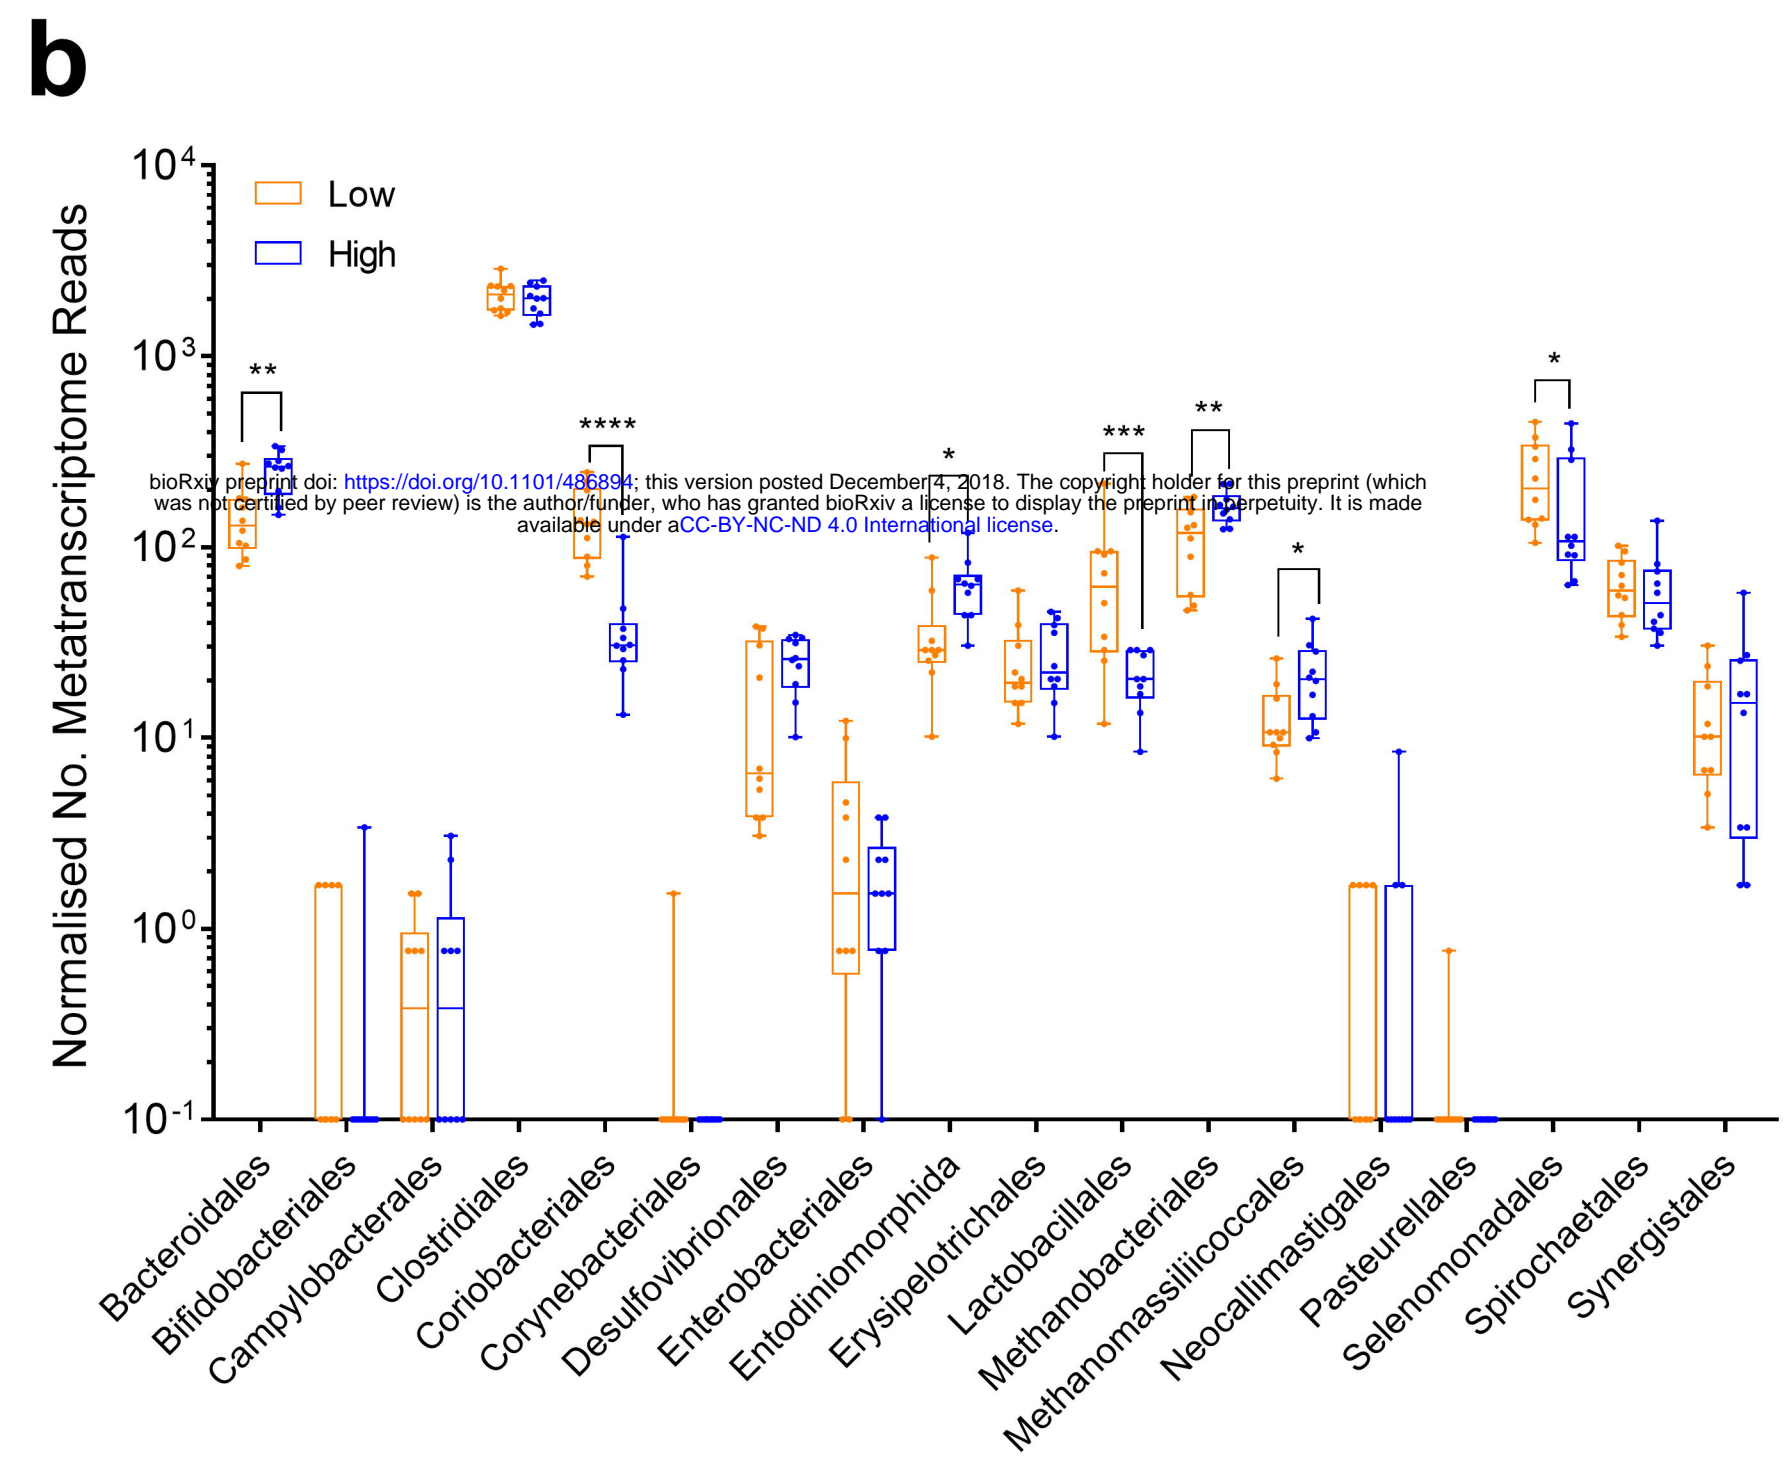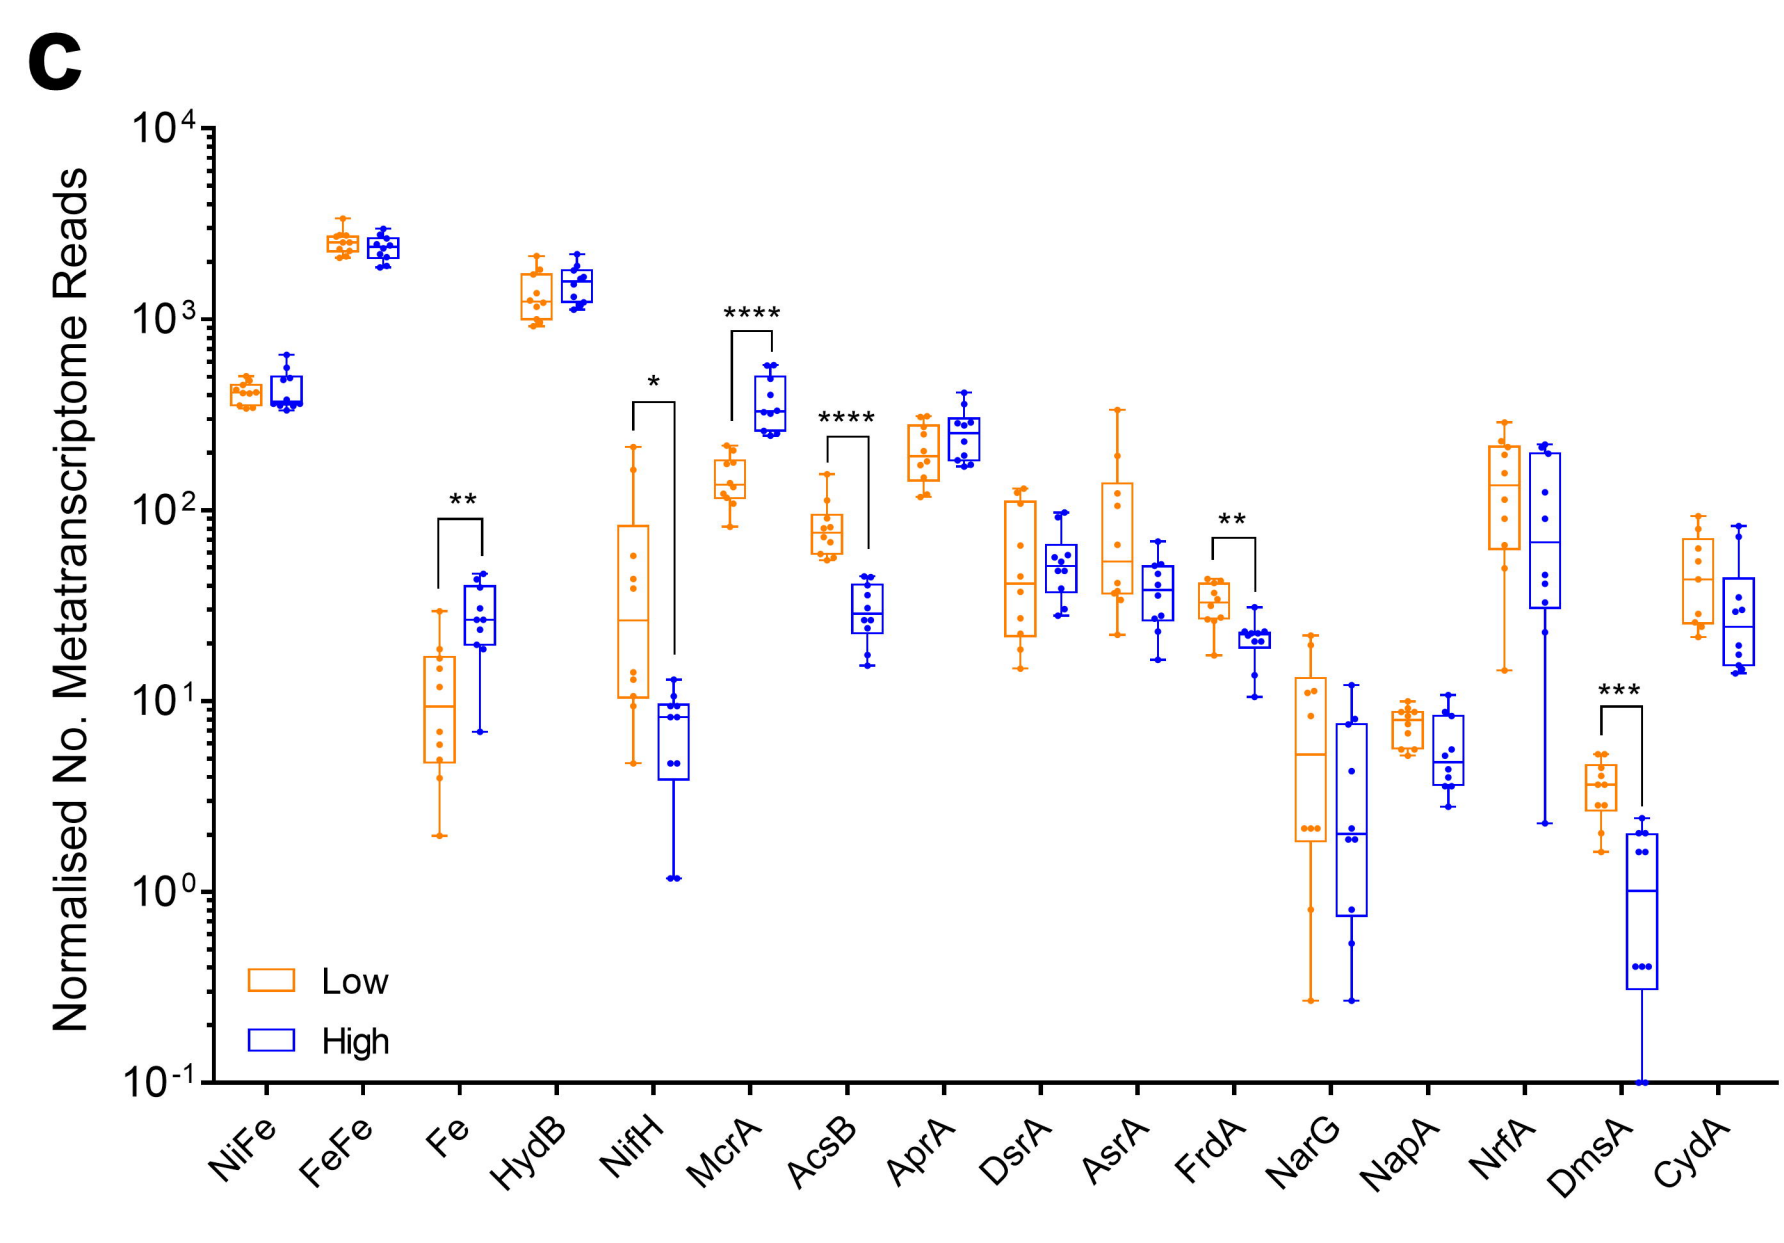



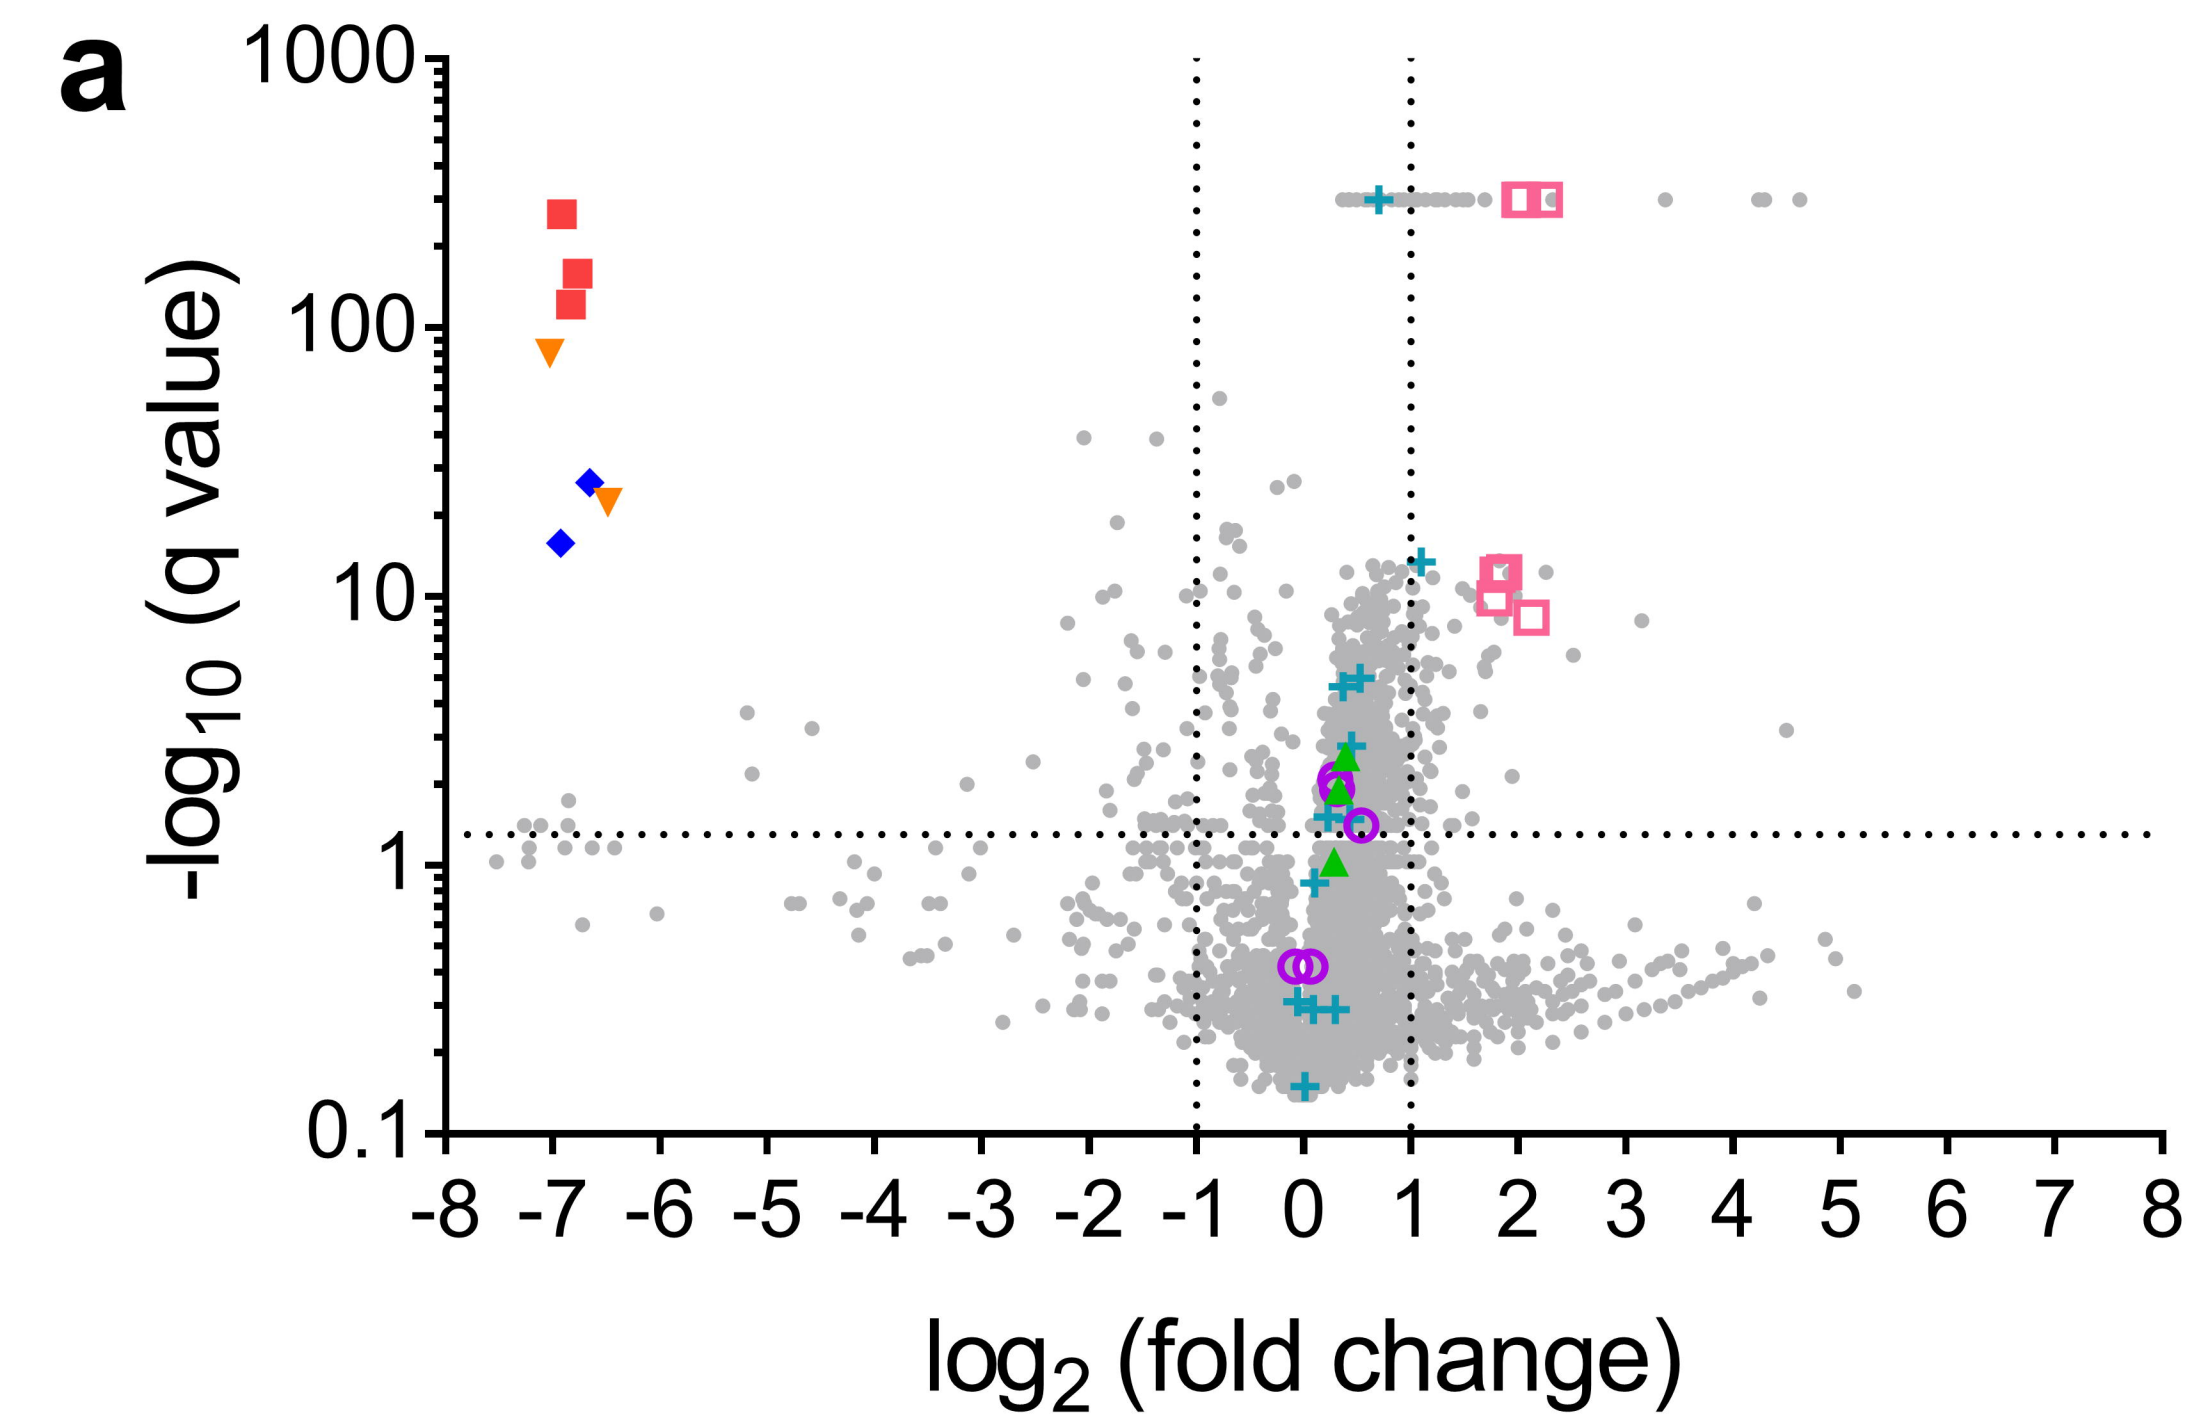

- ▲ Bifurcating hydrogenase
- ▼ Fermentative hydrogenase
- ◆ Sensory hydrogenase
- Alcohol dehydrogenase
- Pyruvate formate lyase
- TPP biosynthesis
- + Glycolysis enzymes

**b**

111 × downregulated: Group A1 (fermentative) and Group C (sensory) [FeFe]-hydrogenases

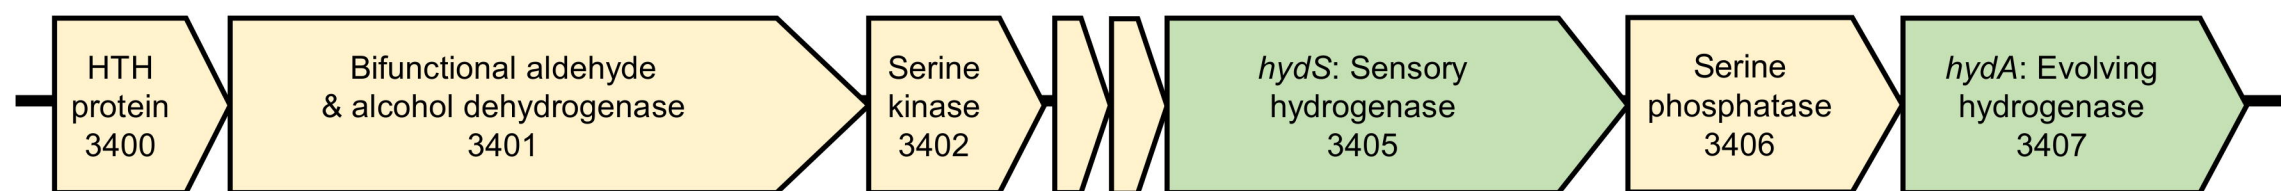

1.26 × upregulated: Group A3 (electron-bifurcating) [FeFe]-hydrogenase

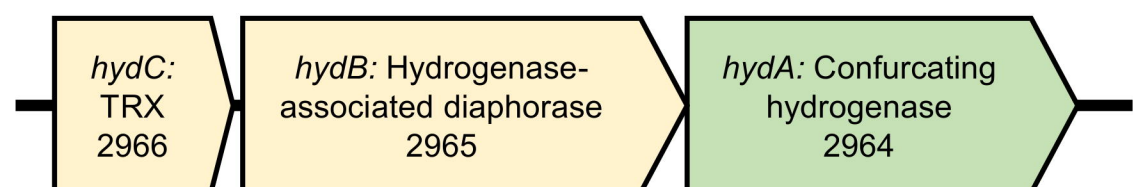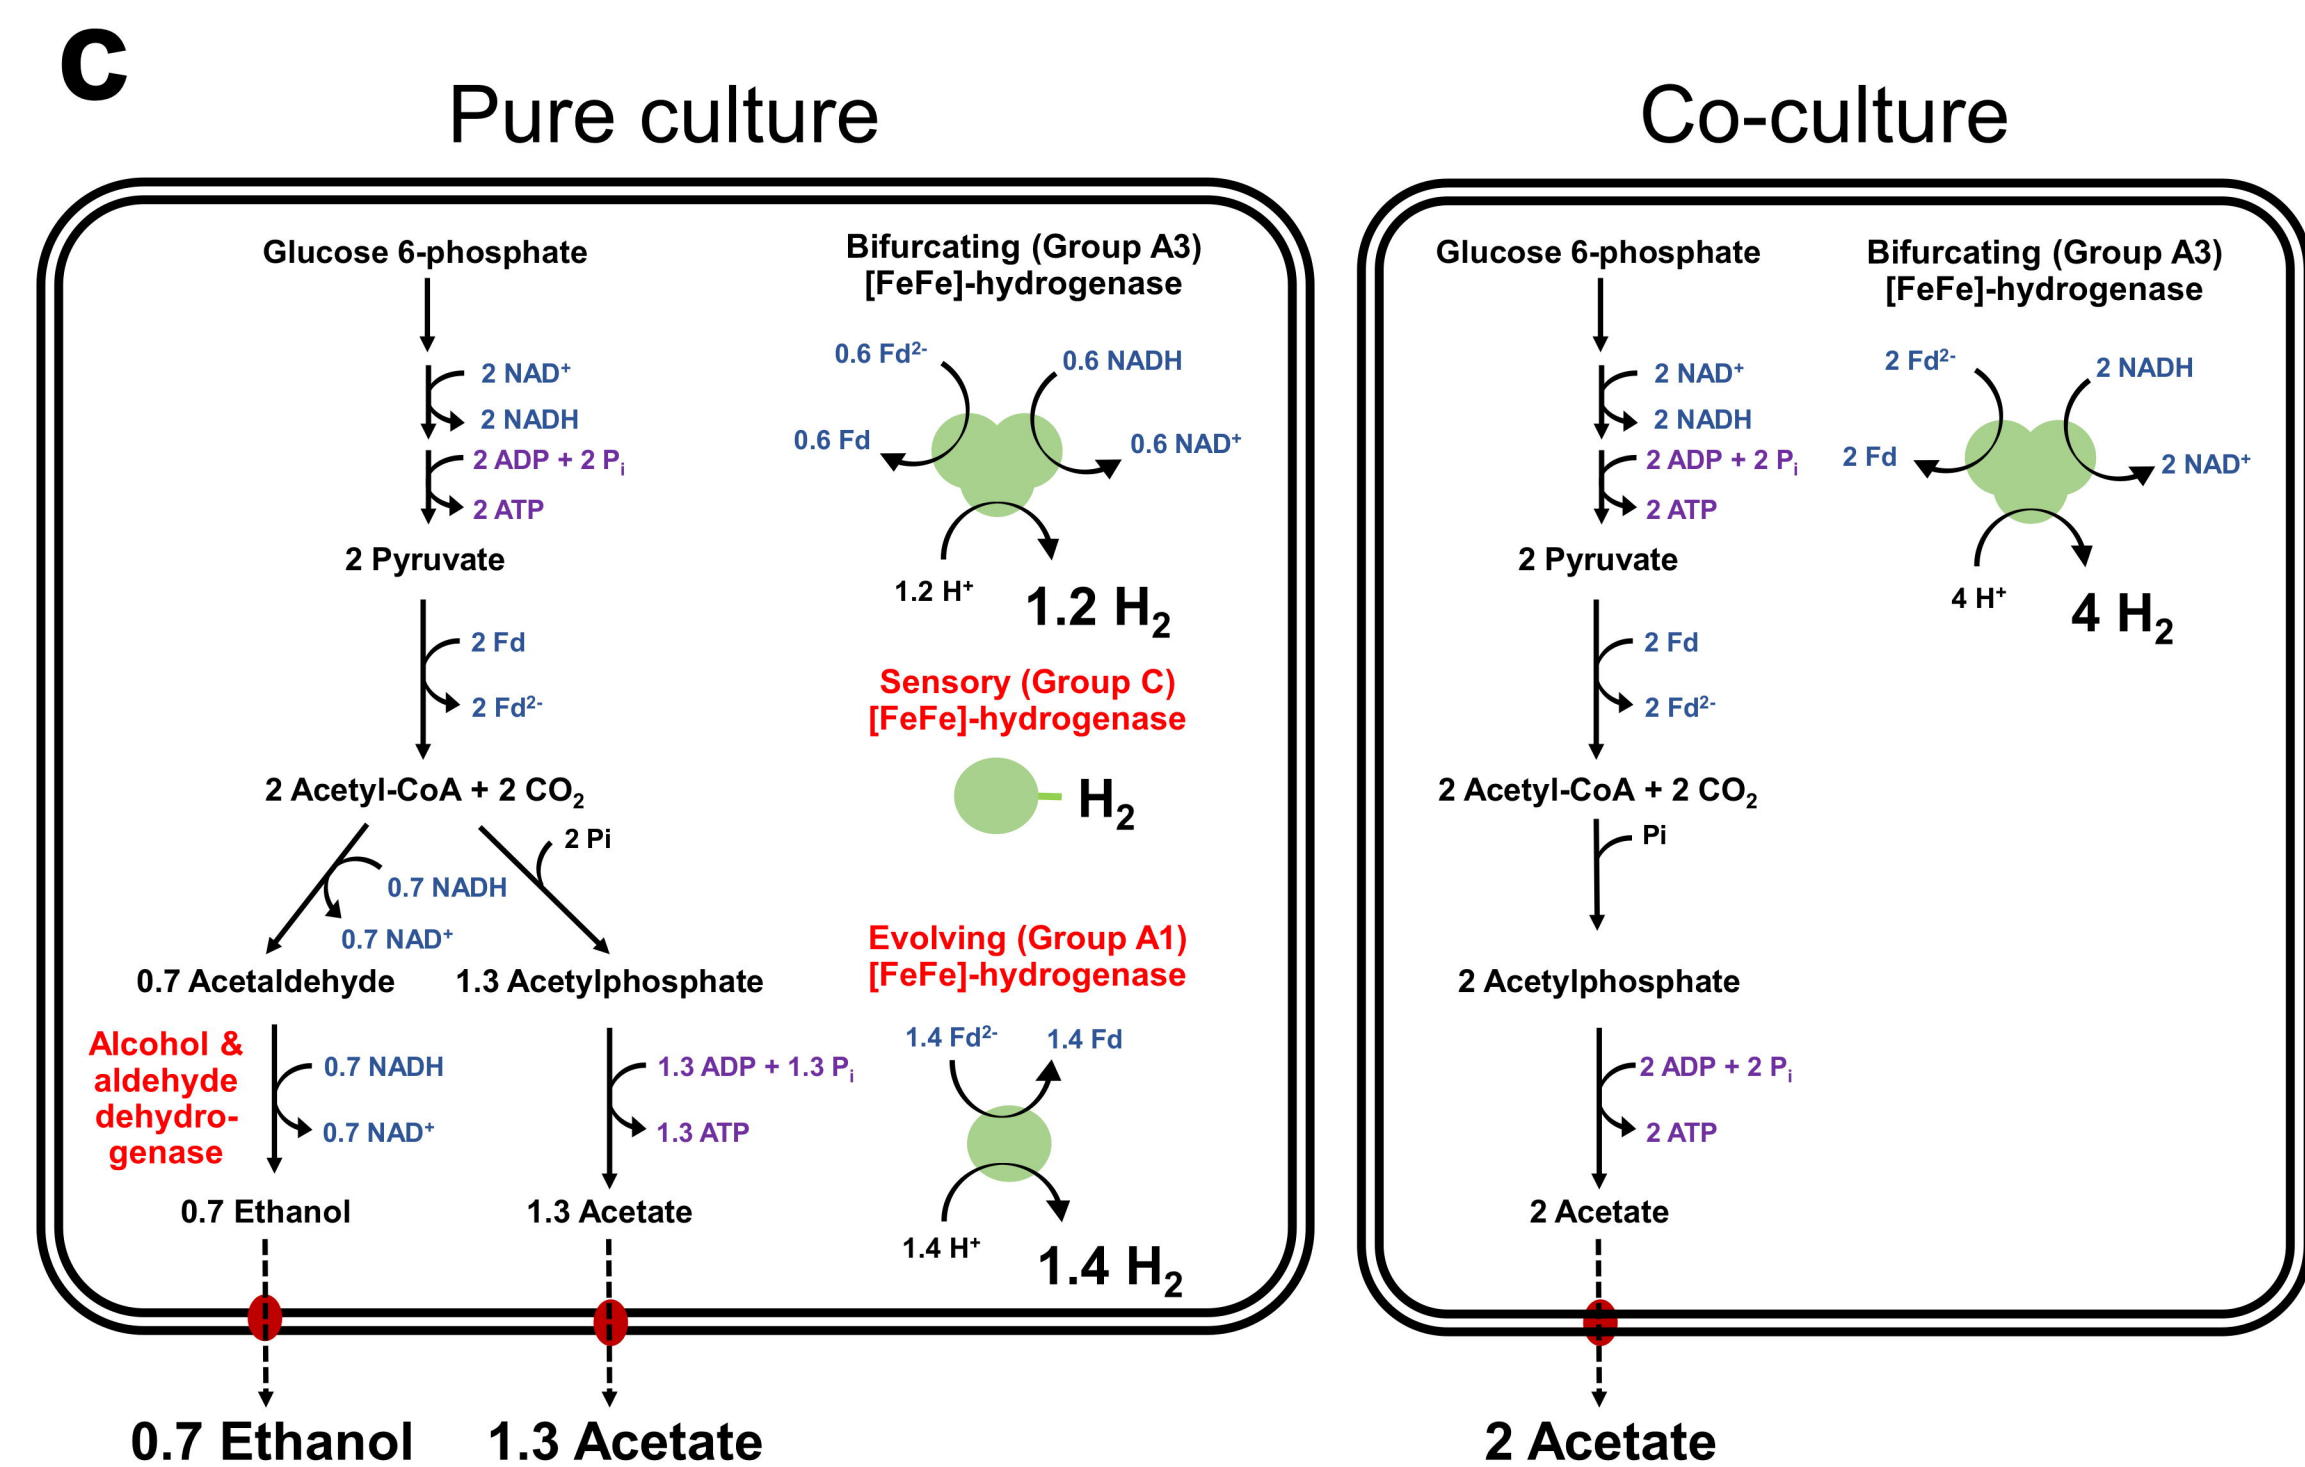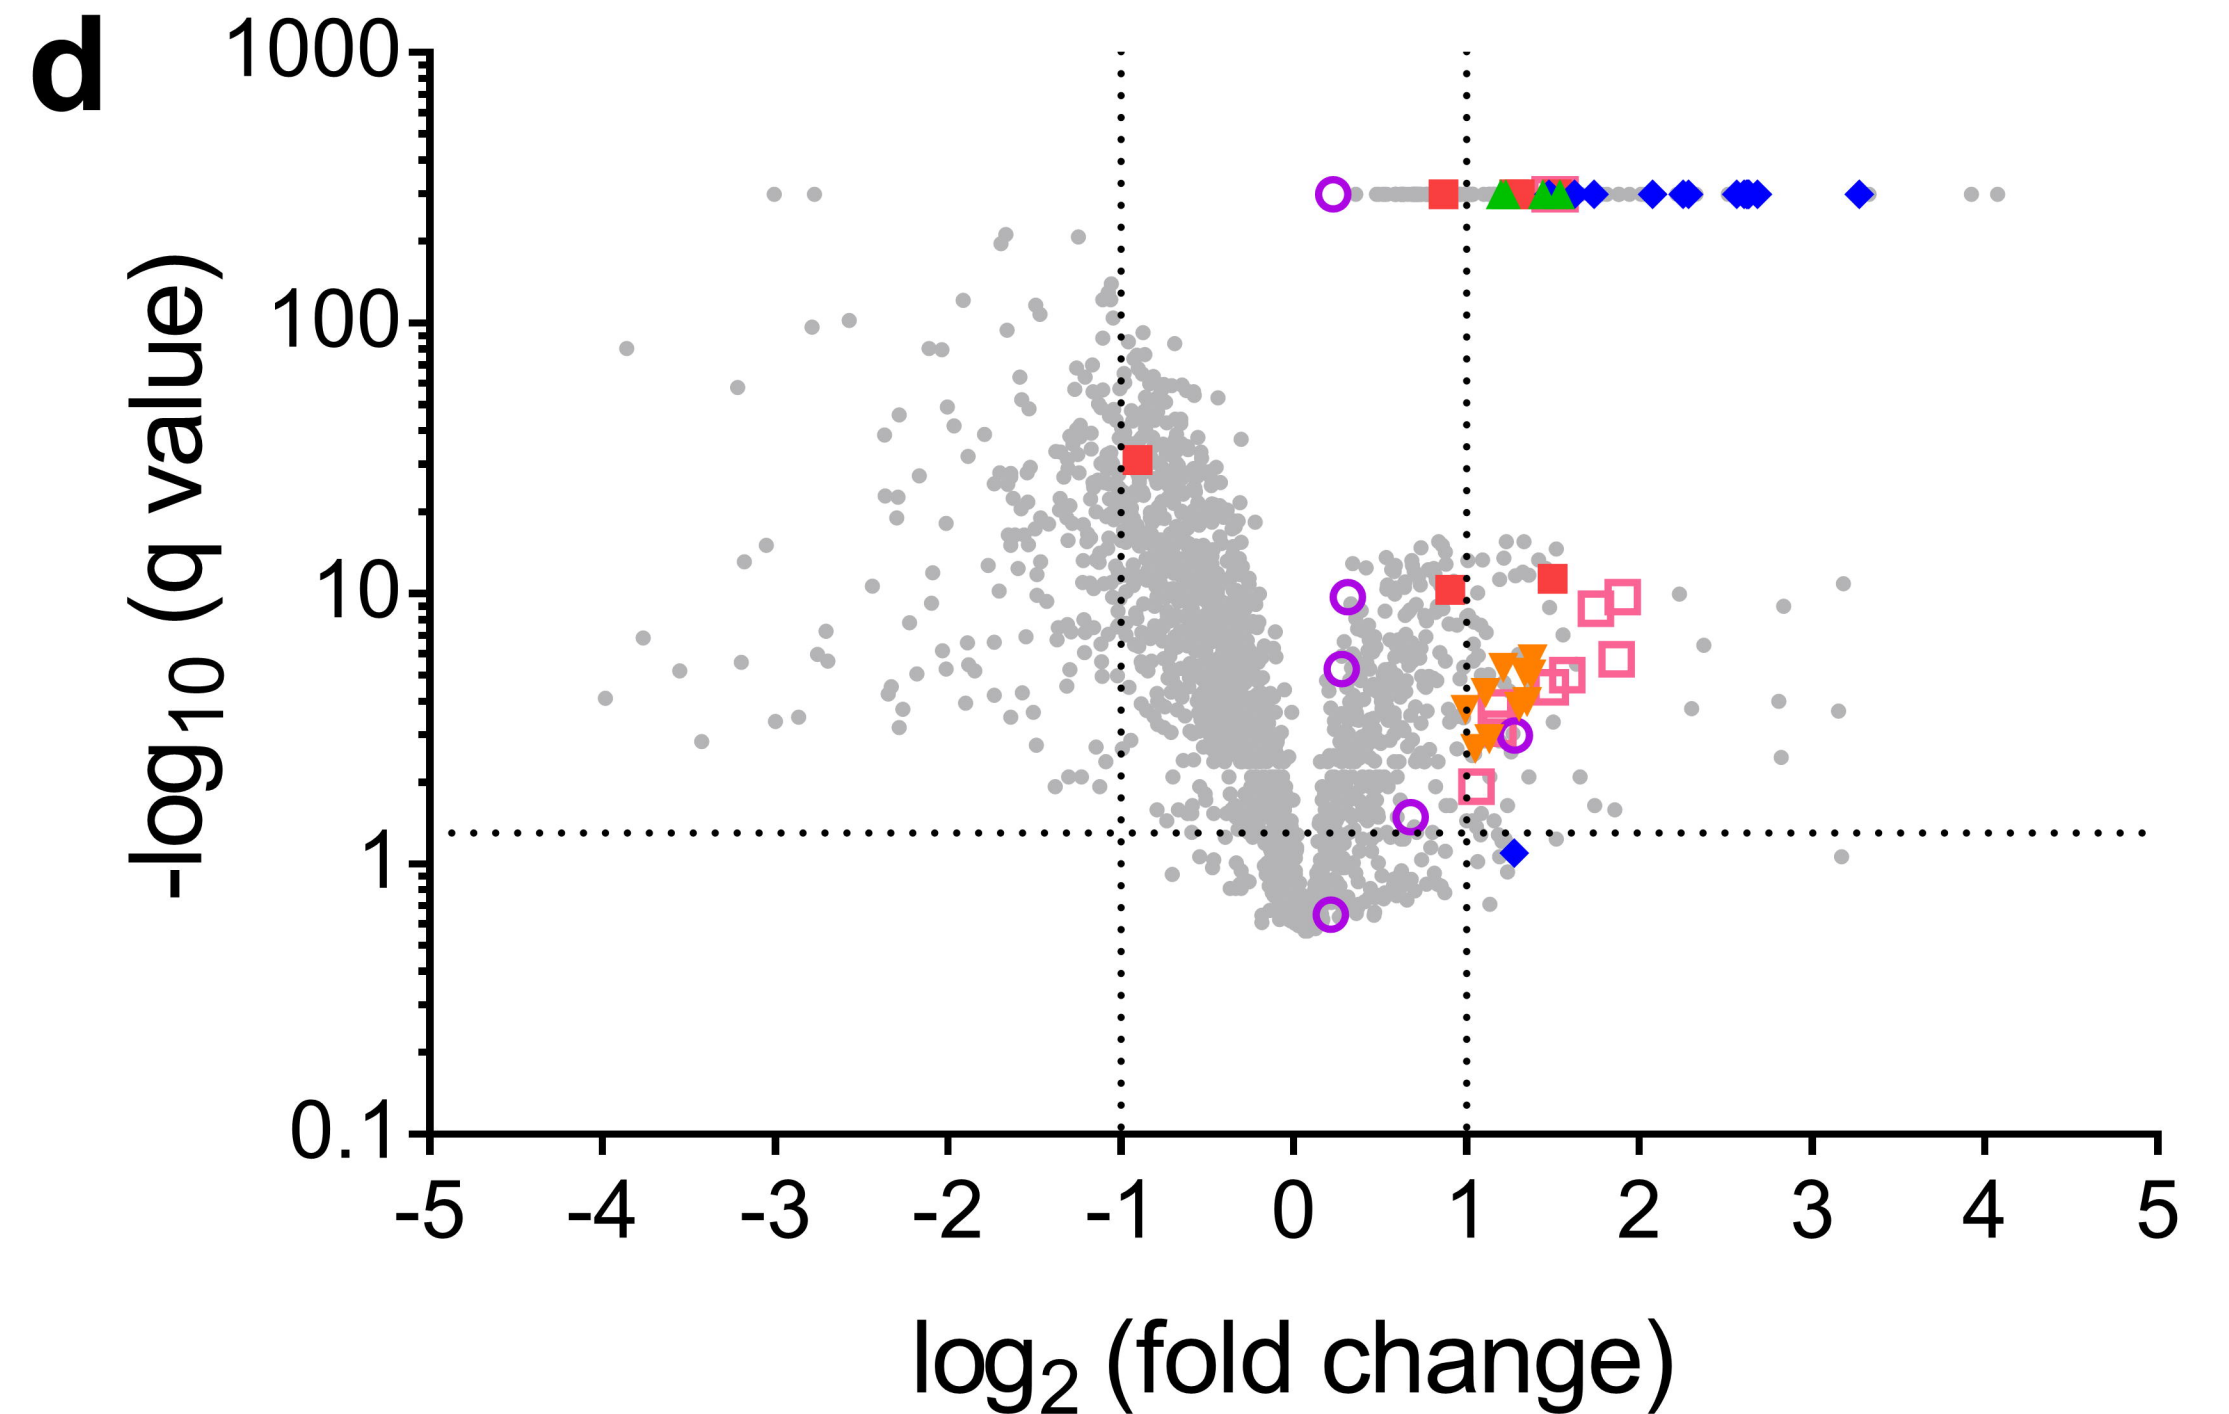

- ▲ Respiratory hydrogenase
- ▼ Hydrogen formatelyase
- ◆ Formate dehydrogenases
- Fumarate acquisition
- Fumarate reductases
- Nitrate ammonification

**e**

2.7 × upregulated: Group 1b (respiratory uptake) [NiFe]-hydrogenase

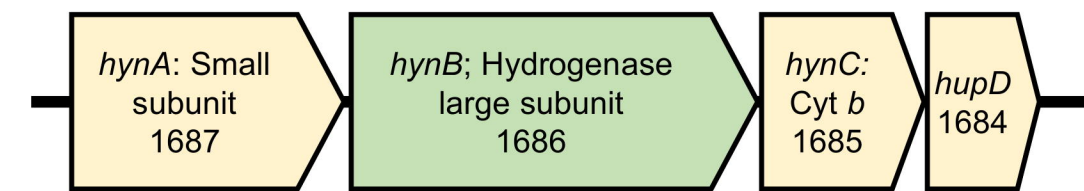

2.4 × upregulated: Group 4a (formate hydrogenlyase) [NiFe]-hydrogenases

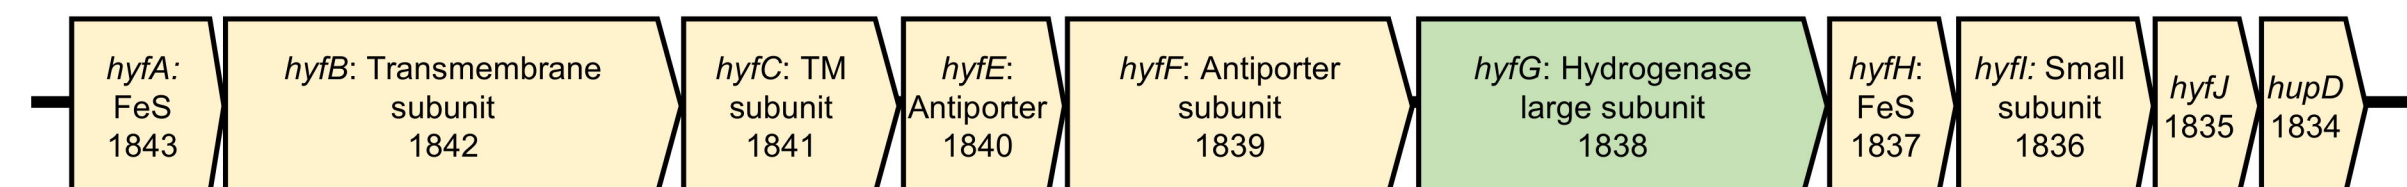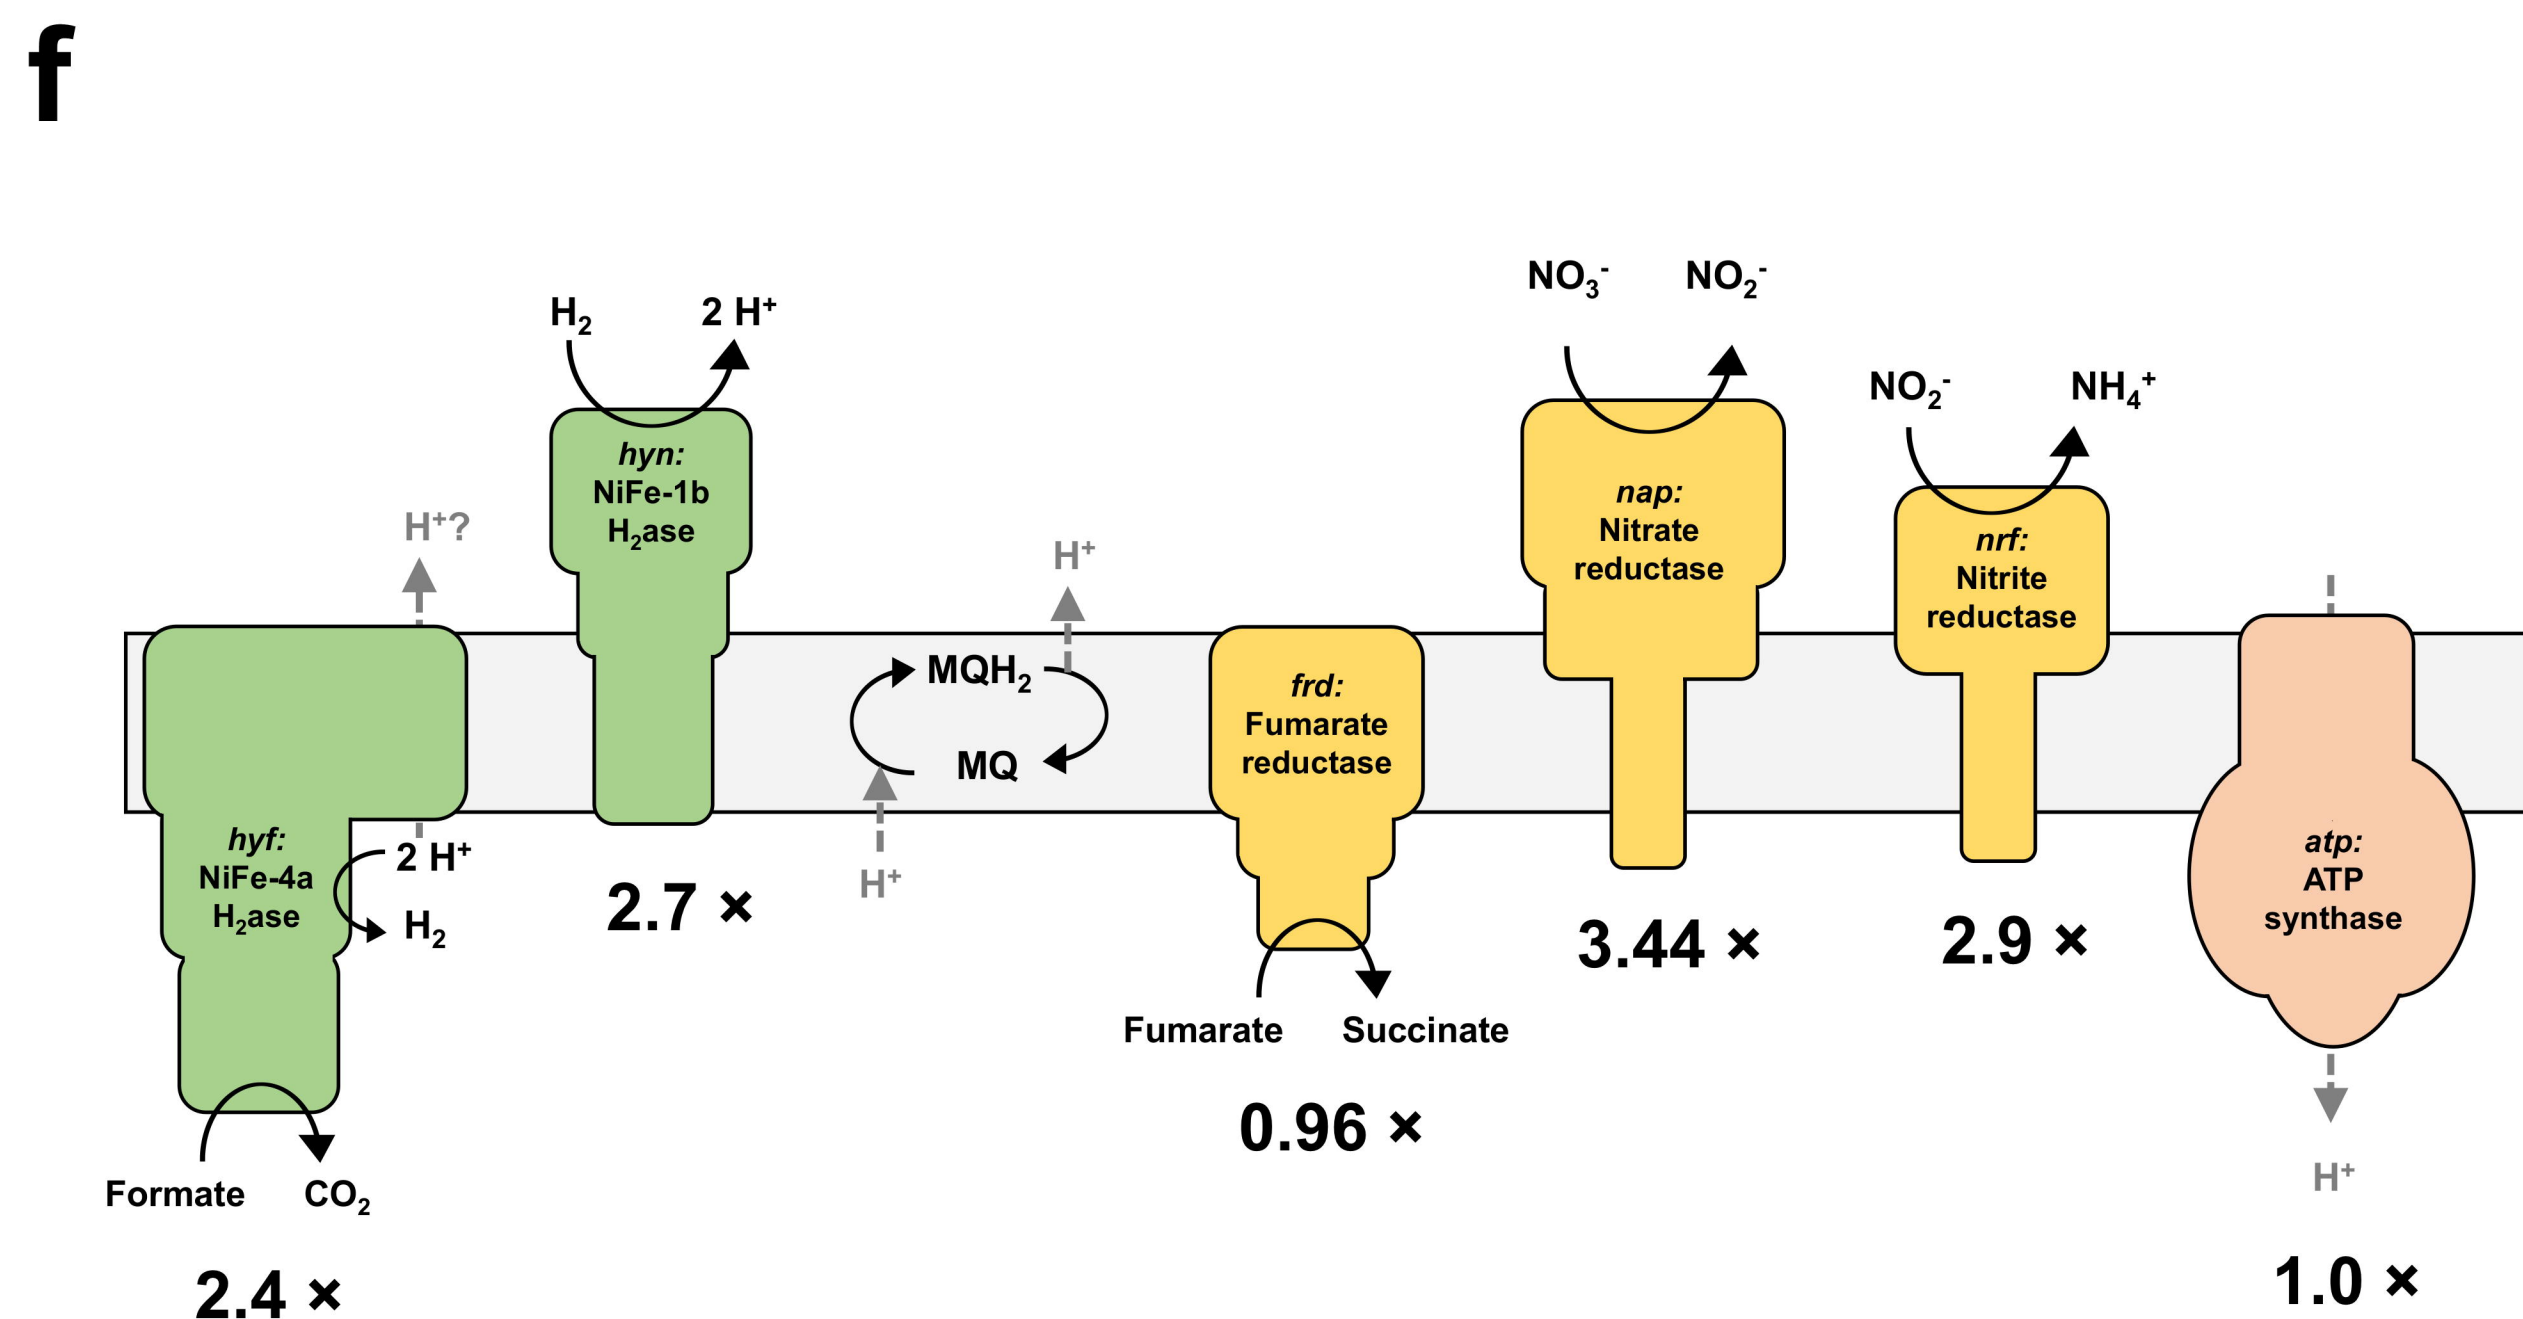

Source: https://www.biorxiv.org/content/biorxiv/early/2018/12/04/486894.full.pdf
